## RESEARCH ARTICLE

# Effects of the menstrual cycle phase on anterior cruciate ligament neuromuscular and biomechanical injury risk surrogates in eumenorrheic and naturally menstruating women: A systematic review

Thomas Dos'Santos<sup>1,2\*</sup>, Georgina K. Stebbings<sup>1,2</sup>, Christopher Morse<sup>1,2</sup>, Medha Shashidharan<sup>1,2</sup>, Katherine A. J. Daniels<sup>1,2</sup>, Andy Sanderson<sup>1,2</sup>

**1** Department of Sport and Exercise Sciences, Musculoskeletal Science and Sports Medicine Research Centre, Manchester Metropolitan University, Manchester, United Kingdom, **2** Manchester Institute of Sport, Manchester Metropolitan University, Manchester, United Kingdom

\* [t.dossantos@mmu.ac.uk](mailto:t.dossantos@mmu.ac.uk)

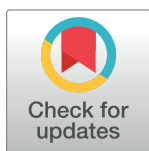

## OPEN ACCESS

**Citation:** Dos'Santos T, Stebbings GK, Morse C, Shashidharan M, Daniels KAJ, Sanderson A (2023) Effects of the menstrual cycle phase on anterior cruciate ligament neuromuscular and biomechanical injury risk surrogates in eumenorrheic and naturally menstruating women: A systematic review. PLoS ONE 18(1): e0280800. <https://doi.org/10.1371/journal.pone.0280800>

**Editor:** Javier Peña, University of Vic - Central University of Catalonia: Universitat de Vic - Universitat Central de Catalunya, SPAIN

**Received:** March 17, 2022

**Accepted:** January 9, 2023

**Published:** January 26, 2023

**Peer Review History:** PLOS recognizes the benefits of transparency in the peer review process; therefore, we enable the publication of all of the content of peer review and author responses alongside final, published articles. The editorial history of this article is available here: <https://doi.org/10.1371/journal.pone.0280800>

**Copyright:** © 2023 Dos'Santos et al. This is an open access article distributed under the terms of the [Creative Commons Attribution License](https://creativecommons.org/licenses/by/4.0/), which permits unrestricted use, distribution, and reproduction in any medium, provided the original author and source are credited.

## Abstract

### Background

Eumenorrheic women experience cyclic variations in sex hormones attributed to the menstrual cycle (MC) which can impact anterior cruciate ligament (ACL) properties, knee laxity, and neuromuscular function. This systematic review aimed to examine the effects of the MC on ACL neuromuscular and biomechanical injury risk surrogates during dynamic tasks, to establish whether a particular MC phase predisposes women to greater ACL injury risk.

### Methods

PubMed, Medline, SPORTDiscus, and Web of Science were searched (May-July 2021) for studies that investigated the effects of the MC on ACL neuromuscular and biomechanical injury risk surrogates. Inclusion criteria were: 1) injury-free women (18–40 years); 2) verified MC phases via biochemical analysis and/or ovulation kits; 3) examined neuromuscular and/or biomechanical injury risk surrogates during dynamic tasks; 4) compared  $\geq 1$  outcome measure across  $\geq 2$  defined MC phases.

### Results

Seven of 418 articles were included. Four studies reported no significant differences in ACL injury risk surrogates between MC phases. Two studies showed evidence the mid-luteal phase may predispose women to greater risk of non-contact ACL injury. Three studies reported knee laxity fluctuated across the MC; two of which demonstrated MC attributed changes in knee laxity were associated with changes in knee joint loading (KJL). Study quality (Modified Downs and Black Checklist score: 7–9) and quality of evidence were low to very low (Grading of Recommendations Assessment Development and Evaluation: very low).

**Data Availability Statement:** The data within this study are secondary data and available through the relevant articles referenced throughout. This is a systematic review, and thus, there is no data to provide.

**Funding:** The author received no specific funding for this work.

**Competing interests:** The authors have declared that no competing interests exist.

## Conclusion

It is inconclusive whether a particular MC phase predisposes women to greater non-contact ACL injury risk based on neuromuscular and biomechanical surrogates. Practitioners should be cautious manipulating their physical preparation, injury mitigation, and screening practices based on current evidence. Although variable (i.e., magnitude and direction), MC attributed changes in knee laxity were associated with changes in potentially hazardous KJLs. Monitoring knee laxity could therefore be a viable strategy to infer possible ACL injury risk.

## 1. Introduction

Female athletes (18–40 years old) are ~3.5 times more likely to sustain an ACL injury compared to male athletes [1], depending on sporting population [2]. Despite recent advancements in sports medicine and technology, ACL injury rates in female athletes are not declining [3–6] which is problematic as female sport participation rates are increasing [7, 8]. Female ACL injury incidence rates would therefore be predicted to increase in future due to greater participant exposures. Although risk factors related to skeletal anatomy [9–13], biomechanical movement strategies [14–17], neuromuscular activation patterns [15, 18–20], and biopsychosocial factors (i.e., inequities in socioeconomic status and skill training provision) may partially contribute to the sex disparity in ACL injury [3, 4, 21–23], one specific physiological risk factor increasing in interest is the role of fluctuations in ovarian sex hormones on ACL injury risk attributed to the menstrual cycle (MC).

Eumenorrheic and naturally menstruating women of reproductive age experience variations in ovarian sex hormones during different phases of the MC which can influence physiological systems and function [24–29]. For example, based on a 28-day MC length, the early follicular days 1–5 (Phase 1) is associated with low oestrogen and progesterone, whereas the highest oestrogen to progesterone ratio is observed during late follicular days 6–12 (Phase 2). During ovulation (Phase 3; days 13–15), oestrogen is lower (medium concentration) than phase 2 but higher than phase 1 with low progesterone levels, whereas the mid-luteal days 20–23 (Phase 4; ~7 days post ovulation) contains the highest progesterone concentrations, with relatively high oestrogen levels (> phase 1 and 3 but < than 2) [25, 26, 30]. Due to the different concentrations of ovarian sex hormonal profiles throughout the MC, phases associated with increased oestrogen may impact soft tissue compliance [31, 32], influence collagen formation and the tensile properties and integrity of ligaments (i.e., mechanical load tolerance) [33–35], impacting ligamentous and knee laxity [33, 34, 36], and neuromuscular function [24, 27, 30, 37, 38], and thus potentially increasing ACL injury susceptibility [39, 40].

There is, however, mixed and conflicting evidence that a specific MC phase may predispose female athletes to greater risk of non-contact ACL injury [39–42]. Notably, previous research in this area is generally confounded by methodological and research design limitations. These include inconsistencies in MC verification (i.e., lack of biomechanical analysis or ovulation kits, thus potential inclusion of anovulatory or luteal phase deficient women) and definitions [25–27], non-homogenous group profiling (i.e., describing injury in both the follicular and ovulatory phases [preovulatory] without considering the distinct hormonal variations in the early and late parts of each), inclusion of hormonal contraception (HC) users (distinctly different hormonal profiles) and contact ACL injuries, and use of unreliable injury recall or questionnaires.

As neuroexcitation [38], neuromuscular function [24, 27, 30, 37, 38], and ligamentous and knee laxity [33, 34, 36] can fluctuate throughout the MC, as well as psychological and perceptions of perceived effort and intensity [27], MC hormonal perturbations are likely to affect neuromuscular activation and coordination patterns during high impact tasks [39]. These changes may impact neuromuscular control and movement quality, which may influence the generation of hazardous mechanical loads associated with non-contact ACL injury risk during jump-landing and change of direction (COD) tasks [39]. To improve ACL injury mitigation strategies, injury screening protocols, and physical preparation and management of female athletes, greater understanding of how hormonal, neuromuscular, and biomechanical factors interrelate and influence the execution and movement quality of jump-landing and COD tasks across different MC phases is needed. The aim of this systematic review was to examine the effects of the MC on ACL neuromuscular and biomechanical injury risk surrogates, during dynamic, high impact tasks in eumenorrheic and naturally menstruating women. A secondary aim was to highlight the limitations, considerations, and future directions for research to improve our understanding regarding the effect of the MC on ACL injury risk. It was hypothesised that differences in neuromuscular and biomechanical injury risk surrogates would be observed between MC phases in eumenorrheic and naturally menstruating women. If specific MC phases may have potentially heightened injury risk, the findings may assist in ACL injury mitigation strategies, injury screening protocols, and physical preparation and management of female athletes.

## 2. Methods

This review conforms to the PRISMA 2020 statement guidelines [43] ([S1 Checklist](#)). A review protocol was not pre-registered for this review; however, the review methods were established prior to conducting the review.

### 2.1 Study inclusion and exclusion criteria

Consideration of Population, Intervention, Comparator, Outcomes, and Study design (PICOS) was used to establish the parameters within which the review was conducted [44]. The PICOS strategy is presented in [Table 1](#). Studies that did not meet the PICOS criteria were excluded from the review.

### 2.2 Search strategy

A literature search was performed using PubMed, Medline (OVID), SPORTDiscus, and Web of Science databases by two reviewers (TDS and MS) from May 2021 to July 2021 with the final search date of 2<sup>nd</sup> July 2021. Citation tracking on Google Scholar was also used to identify any additional material. A schematic of the search methodology in accordance with established guidelines [43] is presented in [Fig 1](#).

Search terms were as follows:

1. (“Anterior cruciate ligament” OR “knee” OR “ACL”)
2. (“biomechanic” OR “biomechanics” OR “biomechanical” OR “neuromuscular” OR “injury” OR “kinetic” OR “kinematic” OR “electromyography” OR “muscle activation” OR “biomec\*” OR “electromy\*”)
3. (“menstrual phase” OR “menstrual cycle” OR “menstrual” OR “menstruation” OR “follicular phase” OR “luteal phase” OR “ovulation” OR “ovulatory”)
4. 1 AND 2 AND 3

**Table 1. Consideration of population, intervention, comparator, outcomes and study design.**

|                              |                                                                                                                                                                                                                                                                                                                                                                                                                                                                                                                                                                                                                                                                                                                                                                                                                                                                                                                                                                                                                                                                                                                                                                                                                                                                                                                                                                                                                                                                                                                                                                                                                                                                                              |
|------------------------------|----------------------------------------------------------------------------------------------------------------------------------------------------------------------------------------------------------------------------------------------------------------------------------------------------------------------------------------------------------------------------------------------------------------------------------------------------------------------------------------------------------------------------------------------------------------------------------------------------------------------------------------------------------------------------------------------------------------------------------------------------------------------------------------------------------------------------------------------------------------------------------------------------------------------------------------------------------------------------------------------------------------------------------------------------------------------------------------------------------------------------------------------------------------------------------------------------------------------------------------------------------------------------------------------------------------------------------------------------------------------------------------------------------------------------------------------------------------------------------------------------------------------------------------------------------------------------------------------------------------------------------------------------------------------------------------------|
| <b>Population</b>            | Participants included women who were: a) aged between 18 and 40 years old; b) Healthy Eumenorrhic / naturally menstruating women of reproductive age (i.e., post-menarche and pre-menopausal) who experience ovulation confirmed via biochemical analysis or ovulation kits; c) free from any menstrual-related dysfunctions (e.g., amenorrhea) or any other conditions (e.g., pregnancy, eating disorders or disordered eating, low energy availability and relative energy deficiency syndrome) known to affect the hypothalamic–pituitary–ovarian axis [24]; d) never previously sustained a severe knee injury such as an ACL injury, and no previous lower-limb injury which required surgery or no previous lower limb injury within a year prior to testing; e) engaged in physical activity or sport from recreational to elite playing status [45]. Studies that contained participants with previous or current history of polycystic ovary syndrome (PCOS) were excluded.                                                                                                                                                                                                                                                                                                                                                                                                                                                                                                                                                                                                                                                                                                         |
| <b>Intervention / Method</b> | A specific intervention was not investigated but participants were required to meet the population criteria above. Studies must have examined biomechanical and/or neuromuscular surrogates of non-contact ACL injury risk during a pre-planned or unplanned bilateral or unilateral landing / jump-landing, deceleration, or COD task using 3D motion and/or GRF analysis, 2D kinematic analysis, goniometry, and/or surface electromyography (sEMG). Only studies that verified participants' MC phase via biochemical analysis (i.e., blood/serum analysis) and / or ovulation kits were included, in line with McNulty et al. [24].                                                                                                                                                                                                                                                                                                                                                                                                                                                                                                                                                                                                                                                                                                                                                                                                                                                                                                                                                                                                                                                      |
| <b>Comparator</b>            | To determine the effect of MC phase on neuromuscular and biomechanical injury risk surrogates, included studies must compare an outcome measure (i.e., surrogate of ACL injury risk) at a minimum of 2 phases of MC in line with McNulty et al. [24]. Comparisons must have been made between two of the following MC phases in line with classifications provided in previous research [24, 25]: early follicular (days 1–5), late follicular (days 6–12), ovulation (days 13–15), early luteal (days 16–19), mid-luteal (days 20–23) and late luteal (days 24–28).                                                                                                                                                                                                                                                                                                                                                                                                                                                                                                                                                                                                                                                                                                                                                                                                                                                                                                                                                                                                                                                                                                                         |
| <b>Outcomes</b>              | Studies must have included precise mean and SD or SEs for injury risk surrogates for all phases examined. Subsequently, a change in injury risk surrogate between MC phases denotes a potential change in non-contact ACL injury risk. Biomechanical non-contact ACL injury risk surrogates (i.e., factor which has been shown to increase ACL loading / strain / KJL or prospectively shown to predict injury) included [9, 46, 47]: knee abduction, rotation, flexion moments / impulse (knee joint loads) due to the propensity to increase ACL strain [47, 48], or studies that investigated ACL loading via musculoskeletal modelling [49, 50] or measured proximal anterior tibial shear [51]. Technical, kinetic, or kinematic determinants of surrogates of injury risk (i.e., KJL) [9, 46, 52] related to quadriceps, ligament, trunk, and/or leg dominance, such as: vertical / posterior GRF / impulse; initial or peak lateral trunk flexion/rotation angle, hip internal rotation angle, knee valgus / internal rotation angle, knee flexion / hip flexion angle, and foot progression angles were also considered as biomechanical injury risk surrogates. Because neuromuscular activation patterns have been shown to predict non-contact ACL injury [53, 54], and has the potential to support ligament unloading [55], or increase ACL loading [56–59]; studies that examined outcome measures related to quadriceps femoris, hamstrings, gluteal groups, gastrocnemius, and / or soleus preactivation, time to activation, peak activation at pre ground contact, initial contact and / or over weight-acceptance were included and considered as injury risk surrogates. |
| <b>Study design</b>          | Clinical studies were included for analysis if they: a) were a peer reviewed full published article in English using human participants; b) had the primary or secondary objective of monitoring changes in ACL injury risk surrogates between MC phases; and c) included within-group comparison for phases of MC with outcome measures clearly taken during two or more MC phases.                                                                                                                                                                                                                                                                                                                                                                                                                                                                                                                                                                                                                                                                                                                                                                                                                                                                                                                                                                                                                                                                                                                                                                                                                                                                                                         |
| <b>Other data extraction</b> | The following data was extracted and recorded in a spreadsheet:<br><ol style="list-style-type: none"> <li>1. author names, publication year</li> <li>2. sample size and participant characteristics including sport(s), playing level/status, training history, strength training history/status/profile</li> <li>3. timing of injury risk surrogate (outcome measures) during the MC and whether testing order was randomised</li> <li>4. how MC phase was identified and verified (method)</li> <li>5. how ACL injury risk surrogate was assessed (methods)</li> <li>6. reliability and familiarisation stated for outcome measures / tasks (if reported)</li> <li>7. outcome measures with results</li> </ol>                                                                                                                                                                                                                                                                                                                                                                                                                                                                                                                                                                                                                                                                                                                                                                                                                                                                                                                                                                             |

**Key:** ACL: Anterior cruciate ligament; MC: Menstrual cycle; KJL: Knee joint load; COD: Change of direction; 2D: Two-dimensional; 3D: Three-dimensional; GRF: Ground reaction force

<https://doi.org/10.1371/journal.pone.0280800.t001>

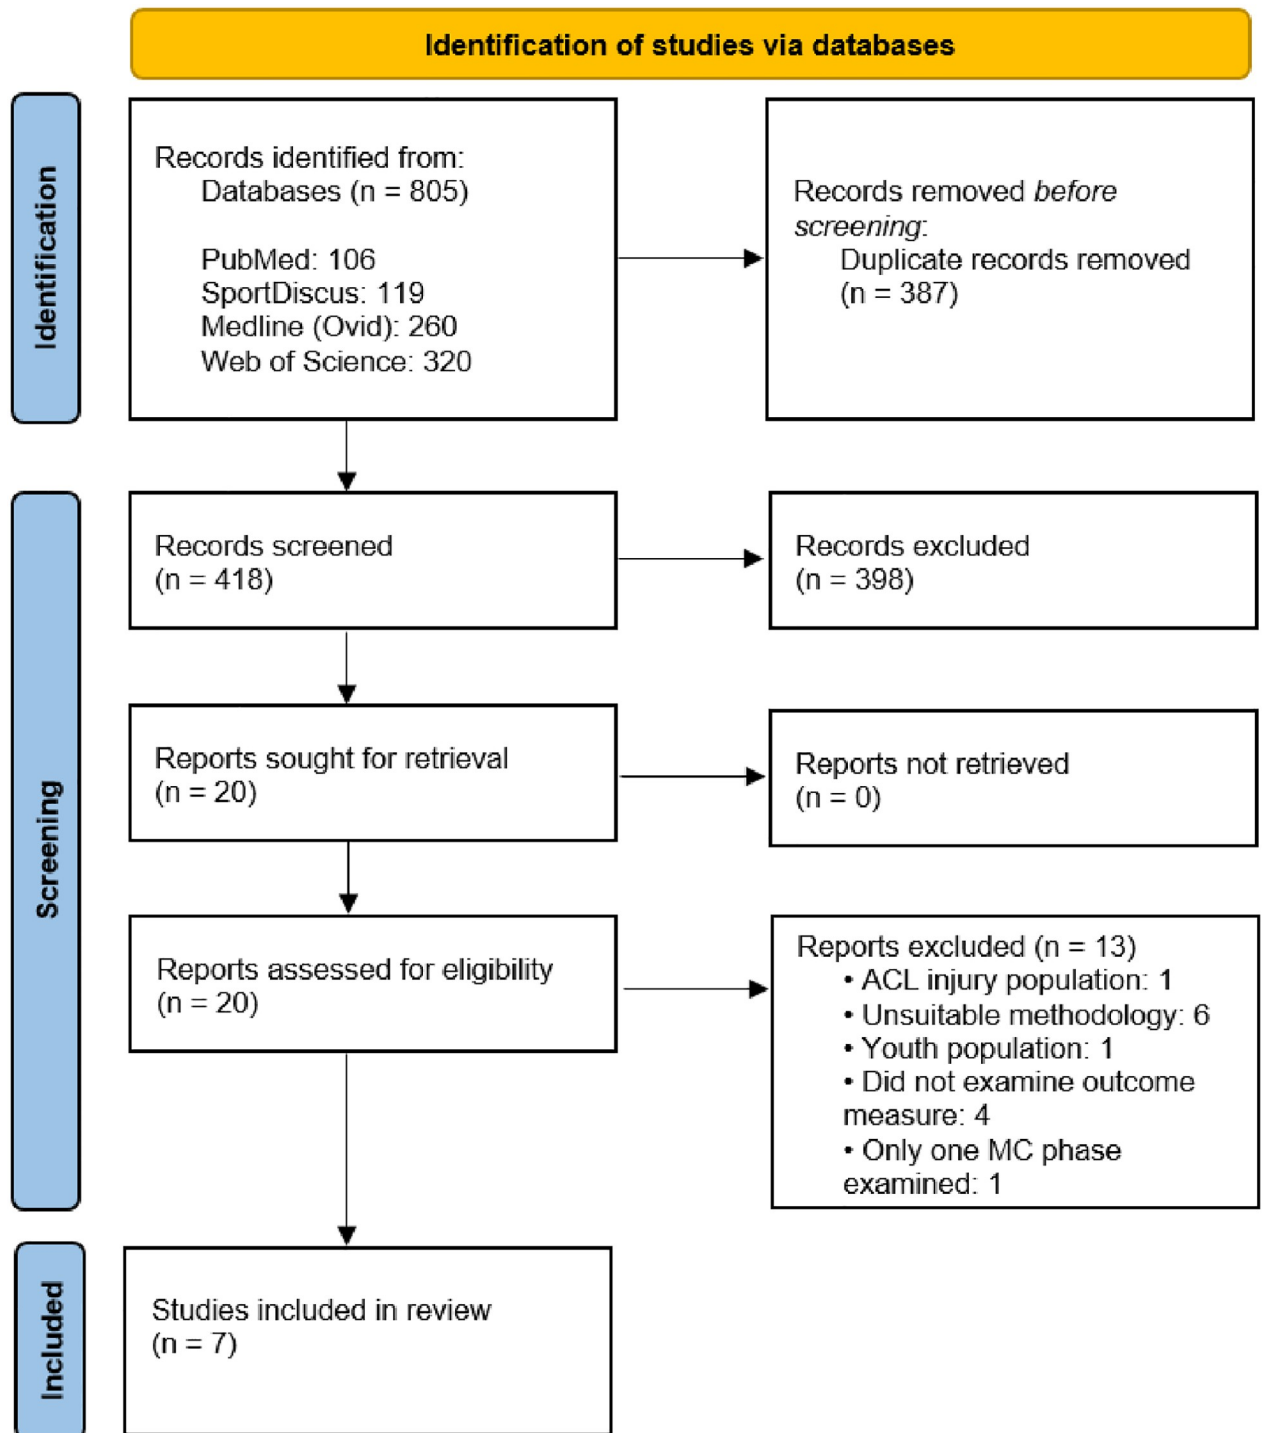

**Fig 1.** Flow chart illustrating the different phases of the search strategy in accordance with PRISMA guidelines. Adapted from Page et al. [43].

<https://doi.org/10.1371/journal.pone.0280800.g001>

Subsequently, bibliographies of prospectively eligible studies were compiled and hand searched by two independent reviewers to screen for further suitable studies. Studies were first assessed based on title and abstract to identify potentially eligible studies, the full text of these studies was then read to confirm if they met the eligibility criteria. If disagreement on eligibility

occurred between the two reviewers (TDS and MS), a third independent reviewer (AS) was consulted, and their decision deemed as final.

### 2.3 Quality assessment of included studies and quality of evidence

Study quality was assessed by two reviewers (TDS and MS) and independently verified by one reviewer (AS). The appraisal tool was based on the Downs and Black checklist for measuring study quality and was modified according to McNulty et al. [24] who conducted a related review examining the effect of MC on exercise performance, and thus developed a more appropriate tool for the present review. The modified Downs and Black checklist comprised 15 outcomes, from five domains: (1) reporting; (2) external validity; (3) internal validity—bias; (4) internal validity—confounding; and (5) power. A maximum attainable score of 16 could be awarded, whereby study quality was categorised as follows: “high” (14–16); “moderate” (10–13); “low” (6–9); or “very low” (0–5) [24]. The results of the Downs and Black assessment were used to assign an *a priori* quality rating to each study. In accordance with McNulty et al. [24], the *a priori* rating was then either maintained, or downgraded a level, based on the response to two questions that were considered key to the directness of these research studies: Q.1) was the MC phase confirmed using blood samples? If the authors reported using blood samples to confirm MC phase, the *a priori* rating was maintained and if not, the study was downgraded a level (e.g., a study that started out as “high” in quality, but did not confirm MC phase using a blood sample, drops to “moderate” in quality); and Q.2) was the MC phase confirmed using urinary ovulation detection kits? If the authors reported the use of a urinary ovulation detection kit to identify MC phase, the Q.1 rating was maintained; if not, the study was downgraded a level. As such, the maximum rating for any study that does not use serum analysis or urinary ovulation detection kits to identify and verify MC phase is “low” [24].

Finally, the Grading of Recommendations Assessment, Development, and Evaluation (GRADE) approach was implemented to further assess the quality of evidence obtained from the present review [60]. The tool was applied for surrogates of ACL injury risk (Table 1; outcomes) for five determinants: risk of bias, inconsistency, imprecision, indirectness, and publication bias [61]. As all studies in this review were experimental / clinical studies (i.e., repeated measures observations with no formal intervention or treatment), the GRADE scores initially start with a low rating. The overall quality of evidence within the studies was upgraded for factors such as large effect sizes or dose-response relationships (i.e., directness) or downgraded for factors including risk of bias (i.e., control of confounding factors), imprecision (i.e., reporting of confidence intervals and *p* values), inconsistency (i.e., reported results / effects), indirectness (i.e., outcome measures and comparisons between MC phases) and publication bias [60, 61].

### 2.4 Data collation

Quantitative data pertaining to study methodology, participant characteristics, MC phase and verification, ACL injury risk surrogates, reliability measures, and results (Table 1) were obtained for qualitative analysis by two independent reviewers (TDS and MS). Results were collated through identifying significant ( $p < 0.05$ ) and non-significant findings ( $p > 0.05$ ) for outcome measures and correlational R values where applicable, while percentage changes and effect sizes were also extracted if provided by the authors.

## 3. Results

### 3.1 Literature search

Fig 1 illustrates a flow chart which summarises the results of the systematic search process.

### 3.2 Study characteristics and findings

Seven studies met the inclusion criteria for this review [33–35, 62–65]. An overview of the methodological quality assessment is provided in Table 2, while study characteristics and findings are presented in Tables 3 and 4. Sample sizes ranged from 10 to 71 [33–35, 62, 64, 65], with Shultz et al. [63] examining a substantially larger sample size of 71 compared to the next highest ( $n = 28$ ). Participant characteristics were generally poorly described across all studies with no study providing any information pertaining to specific sports, skill level, or resistance training history.

Table 3 provides specific information pertaining to tasks examined (primarily bilateral and unilateral jumping), biomechanical and neuromuscular measures (primarily via 3D analysis  $n = 6$  and EMG  $n = 3$ ), injury risk surrogates, and measurement techniques for the included studies. Additionally, Table 3 provides information pertaining to no hormonal contraception usage ( $n = 4$ ), MC phase verification method (i.e., urinary luteal hormone measurement  $n = 5$  or blood samples  $n = 5$ ), the MC phases examined (ranging from 2–5 phases in accordance with recommendations [24]) for the included studies.

With respect to the effect of MC phase on neuromuscular and biomechanical non-contact ACL injury risk surrogates, four studies observed no significant or meaningful differences between MC phases [33, 34, 62, 65], while two studies [35, 64] showed evidence that the mid-luteal phase may predispose women to greater risk of non-contact ACL injury compared to the early and late follicular phase based on neuromuscular activity and landing kinematics. Two studies [33, 34] showed that knee laxity fluctuated throughout the MC phases and the change in knee laxity was associated with changes in KJLs; however, considerable individual variation was observed with respect to the MC phase which elicited the greatest knee laxity and KJL. One study [63] also showed that increases in sagittal and frontal knee laxity were associated with increases in knee valgus motion, but muscle activity and KJLs were not significantly different. The researchers [63] examined landing mechanics during the periods of lowest and maximum laxity during the early follicular and mid-luteal phases but the authors do not clearly specify which phase elicited the highest or lowest laxity.

Only one study randomised the testing order across MC phases [64], with three studies confirming that testing order was non-randomised [33, 34, 62]. The remaining studies did not verify if the testing order was randomised [35, 63, 65]. Only one study clearly stated that testing conditions were standardised between MC phases [65], while one study confirmed that the examiner was blinded to MC phase [35]. Only two studies stated that a familiarisation period or session was provided prior to data collection [62, 63]. No study provided any reliability measures pertaining to the neuromuscular or biomechanical outcome measures [33–35, 62–65], nor did any study compare and interpret the change in outcome measure in relation to measurement error [33–35, 62–65]. No study examined joint-joint coordination changes between MC phases [33–35, 62–65], and only one study included a form of temporal analysis [63] while the remaining studies generally conducted discrete point analysis [33–35, 62, 64, 65].

### 3.3 Assessment of methodological quality and quality of evidence

Methodological quality assessment data is presented in Table 2. Three [33–35] and four [62–65] studies were classed as low and very low, respectively, with scores ranging from 7–9. All studies were provisionally (*a priori*) scored as low; however, two studies were downgraded due to the failure to confirm MC phases using blood samples [62, 63], with two more studies downgraded for not verifying MC phases using ovulation kits [64, 65] in accordance with McNulty et al. [24]. Thus, only three studies [33–35] maintained their *a priori* quality rating.

**Table 2. Methodological quality assessment of included studies and quality of evidence.**

| Study                         |                                                                                                                                                                                                                                                                                                                                             | 1                 | 2                       | 3                     | 4                     | 5                        | 6                       | 7                    |
|-------------------------------|---------------------------------------------------------------------------------------------------------------------------------------------------------------------------------------------------------------------------------------------------------------------------------------------------------------------------------------------|-------------------|-------------------------|-----------------------|-----------------------|--------------------------|-------------------------|----------------------|
| Author                        |                                                                                                                                                                                                                                                                                                                                             | Abt et al. (2007) | Chaudhari et al. (2007) | Dedrick et al. (2008) | Okazaki et al. (2017) | Park et al. (2009) AMJSM | Park et al. (2009) BJSM | Shultz et al. (2012) |
| Q                             | Title                                                                                                                                                                                                                                                                                                                                       |                   |                         |                       |                       |                          |                         |                      |
| <b>Reporting</b>              |                                                                                                                                                                                                                                                                                                                                             |                   |                         |                       |                       |                          |                         |                      |
| 1                             | Is the hypothesis/aim/objective of the study clearly described? Yes = 1 No = 0                                                                                                                                                                                                                                                              | 1                 | 1                       | 1                     | 1                     | 1                        | 1                       | 1                    |
| 2                             | Are the main outcomes to be measured clearly described in the introduction or methods section? If the main outcomes are first mentioned in the results section, answer no. Yes = 1 No = 0                                                                                                                                                   | 1                 | 1                       | 1                     | 1                     | 1                        | 1                       | 1                    |
| 3                             | Are the characteristics of the participants included in the study clearly described? In observational studies, inclusion and/or exclusion criteria should be given. In case-control studies, inclusion and/or exclusion and the source of controls should be given. Yes = 1 No = 0                                                          | 0                 | 0                       | 0                     | 0                     | 0                        | 0                       | 0                    |
| 4                             | Were the tested menstrual cycle phases clearly described? Answer yes if the precise criteria used to define phase were provided, answer no if the exact phase tested cannot be ascertained (e.g., vague language such as “early” or “late” were used, without defining the criteria) Yes = 1 No = 0                                         | 1                 | 0                       | 1                     | 1                     | 1                        | 1                       | 1                    |
| 5                             | Are the main findings of the study clearly described? Simple outcome data should be reported for all major findings so the reader can check the major analyses and conclusions. This does not cover statistical tests which are addressed in other questions. Yes = 1 No = 0                                                                | 1                 | 1                       | 1                     | 1                     | 1                        | 1                       | 1                    |
| 6                             | Does the study provide estimates of the random variability in the data for the main outcomes? In non-normal data, inter-quartile range should be reported. In normal data, standard deviation, standard error or confidence intervals should be reported. Yes = 1 No = 0                                                                    | 1                 | 1                       | 1                     | 1                     | 1                        | 1                       | 1                    |
| <b>External validity</b>      |                                                                                                                                                                                                                                                                                                                                             |                   |                         |                       |                       |                          |                         |                      |
| 7                             | Were the subjects confirmed as non-hormonal contraceptive users, for at least three months prior to participation? Yes = 1 No = 0 Unable to determine = 0                                                                                                                                                                                   | 0                 | 0                       | 1                     | 0                     | 1                        | 1                       | 1                    |
| <b>Internal validity–bias</b> |                                                                                                                                                                                                                                                                                                                                             |                   |                         |                       |                       |                          |                         |                      |
| 8                             | Was at least one familiarization trial conducted prior to exercise testing? Yes = 1 No = 0 Unable to determine = 0                                                                                                                                                                                                                          | 1                 | 0                       | 0                     | 0                     | 0                        | 0                       | 1                    |
| 9                             | Were the exercise test conditions adequately standardised (taking into consideration factors including time of day, prior nutritional intake [including caffeine] and prior exercise). Yes (all relevant factors standardised) = 2 Yes (some relevant factors standardised) = 1 Exercise testing unstandardized = 0 Unable to determine = 0 | 0                 | 2                       | 0                     | 0                     | 0                        | 0                       | 0                    |
| 10                            | If any of the results of the study were based on ‘data dredging’ was this made clear? Any analyses that had not been planned at the outset should be clearly indicated. If no retrospective subgroup analyses were reported, then answer yes. Yes = 1 No = 0 Unable to determine = 0                                                        | 0                 | 0                       | 0                     | 0                     | 0                        | 0                       | 0                    |
| 11                            | Were statistical tests used to assess the main outcomes appropriate? The statistical techniques used must be appropriate to the data and the research question. Yes = 1 No = 0 Unable to determine = 0                                                                                                                                      | 1                 | 1                       | 1                     | 1                     | 1                        | 1                       | 1                    |

(Continued)



Table 2. (Continued)

| Study                                                                                                                                                                                            |                                                                                                                                                                                                                                                                                                                                                                        | 1                 | 2                       | 3                     | 4                     | 5                        | 6                       | 7                    |
|--------------------------------------------------------------------------------------------------------------------------------------------------------------------------------------------------|------------------------------------------------------------------------------------------------------------------------------------------------------------------------------------------------------------------------------------------------------------------------------------------------------------------------------------------------------------------------|-------------------|-------------------------|-----------------------|-----------------------|--------------------------|-------------------------|----------------------|
| Author                                                                                                                                                                                           |                                                                                                                                                                                                                                                                                                                                                                        | Abt et al. (2007) | Chaudhari et al. (2007) | Dedrick et al. (2008) | Okazaki et al. (2017) | Park et al. (2009) AMJSM | Park et al. (2009) BJSM | Shultz et al. (2012) |
| Q                                                                                                                                                                                                | Title                                                                                                                                                                                                                                                                                                                                                                  |                   |                         |                       |                       |                          |                         |                      |
| <b>Reporting</b>                                                                                                                                                                                 |                                                                                                                                                                                                                                                                                                                                                                        |                   |                         |                       |                       |                          |                         |                      |
| 12                                                                                                                                                                                               | Were the main outcome measures used accurate ( <i>i.e.</i> , valid and reproducible)? For studies where the validity and reproducibility of outcome measures are clearly described, the question should be answered yes. For studies which refer to other work that demonstrates the outcome measures are accurate, answer yes. Yes = 1 No = 0 Unable to determine = 0 | 0                 | 0                       | 0                     | 0                     | 0                        | 0                       | 0                    |
| <b>Internal validity—confounding (selection bias)</b>                                                                                                                                            |                                                                                                                                                                                                                                                                                                                                                                        |                   |                         |                       |                       |                          |                         |                      |
| 13                                                                                                                                                                                               | Was the order of phase testing randomised? Yes = 1 No = 0 Unable to determine = 0                                                                                                                                                                                                                                                                                      | 0                 | 0                       | 1                     | 0                     | 0                        | 0                       | 0                    |
| <b>Power</b>                                                                                                                                                                                     |                                                                                                                                                                                                                                                                                                                                                                        |                   |                         |                       |                       |                          |                         |                      |
| 14                                                                                                                                                                                               | Did the study have sufficient power to detect an <i>a priori</i> specified scientifically important effect at a pre-determined probability threshold? Answer yes if they included a power calculation, and no if not. Yes = 1 No = 0                                                                                                                                   | 0                 | 0                       | 0                     | 0                     | 0                        | 0                       | 0                    |
| 15                                                                                                                                                                                               | Was study retention > 85%? Yes = 1 No = 0 Unable to determine = 0                                                                                                                                                                                                                                                                                                      | 1                 | 1                       | 1                     | 1                     | 1                        | 1                       | 1                    |
| <b>Grading (assign an <i>a priori</i> study quality rating based on the modified Downs and Black checklist, so all studies will start out as being of “high”, “moderate”, “low”, “very low”)</b> |                                                                                                                                                                                                                                                                                                                                                                        |                   |                         |                       |                       |                          |                         |                      |
| 16                                                                                                                                                                                               | Identify if menstrual cycle phase was confirmed using blood samples. If yes, the <i>a priori</i> rating is maintained and this is the final study quality rating. If not, the study is downgraded a level ( <i>e.g.</i> , a study that started out as high, drops to moderate).                                                                                        | No                | Yes                     | Yes                   | Yes                   | Yes                      | Yes                     | No                   |
| 17                                                                                                                                                                                               | Identify if menstrual cycle phase was confirmed using ovulation kits. If yes, the Q1. rating is maintained. If no, the study is downgraded another level ( <i>e.g.</i> , a study that started out high, drops to low). This means that the maximum rating that any study that does not use blood analysis or ovulation kits is “low” or “very low”.                    | Yes               | No                      | No                    | Yes                   | Yes                      | Yes                     | Yes                  |
| <b>Rating</b>                                                                                                                                                                                    |                                                                                                                                                                                                                                                                                                                                                                        | 8                 | 7                       | 9                     | 7                     | 8                        | 8                       | 9                    |
| <b>Downs and Black checklist (maximum score attainable = 16). Study quality was categorised as follows: “high”: 14–16; “moderate”: 10–13; “low”: 6–9; “very low”: 0–5)</b>                       |                                                                                                                                                                                                                                                                                                                                                                        |                   |                         |                       |                       |                          |                         |                      |
| <b><i>A priori</i></b>                                                                                                                                                                           |                                                                                                                                                                                                                                                                                                                                                                        | Low               | Low                     | Low                   | Low                   | Low                      | Low                     | Low                  |
| <b>Final classification</b>                                                                                                                                                                      |                                                                                                                                                                                                                                                                                                                                                                        | Very low          | Very low                | Very low              | Low                   | Low                      | Low                     | Very low             |

GRADE: Risk of bias: high (-); Inconsistency; yes (-); Imprecision: yes (-); Indirectness: no (+); Publication bias (-); moderate (-). Level of Evidence: Very low

Key: GRADE: Grading of Recommendations Assessment, Development and Evaluation; Q: Question.

<https://doi.org/10.1371/journal.pone.0280800.t002>

There was a small number of studies included which were heterogenous in methodology precluding a meta-analysis; however, we assessed overall quality of evidence using GRADE, and found it to be very low (Table 2).

### 4. Discussion

The primary finding from this systematic review is that it is inconclusive whether a particular MC phase predisposes eumenorrheic and naturally menstruating women to greater non-contact ACL injury risk. Mixed findings from seven studies regarding the effects of the MC on ACL neuromuscular and biomechanical injury risk surrogates were observed, with very low quality of evidence. Four studies reported no meaningful differences in neuromuscular or biomechanical ACL injury risk surrogates between MC phases [33, 34, 62, 65], while two studies

Table 3. Synthesis of methodologies and research designs of eligible studies.

| Study | Author                   | MC verification            |                |                           | MC phases examined |                                   |                                        |                          |                   |                         |                           | Task                     |                         |  |  |
|-------|--------------------------|----------------------------|----------------|---------------------------|--------------------|-----------------------------------|----------------------------------------|--------------------------|-------------------|-------------------------|---------------------------|--------------------------|-------------------------|--|--|
|       |                          | Blood / Biochemical        | Ovulation kits | Early follicular          | Late follicular    | Ovulatory                         | Mid-luteal                             | Follicular               | Luteal            | Cut                     | Jump-stop                 | Drop jump                | Drop-Landing            |  |  |
| 1     | Abt et al. (2007)        | ☒                          | ✓              | ✓                         | ☒                  | ✓                                 | ☒                                      | ☒                        | ☒                 | ☒                       | ☒                         | ☒                        | ☒                       |  |  |
| 2     | Chaudhari et al. (2007)  | ✓                          | ☒              | ☒                         | ☒                  | ✓                                 | ✓                                      | ✓                        | ✓                 | ☒                       | ✓                         | ✓                        | ✓                       |  |  |
| 3     | Dedrick et al. (2008)    | ✓                          | ☒              | ✓                         | ✓                  | ☒                                 | ☒                                      | ☒                        | ☒                 | ☒                       | ☒                         | ☒                        | ☒                       |  |  |
| 4     | Okazaki et al. (2017)    | ✓                          | ✓              | ✓                         | ✓                  | ✓ (spans late follicular)         | ✓                                      | ☒                        | ☒                 | ☒                       | ☒                         | ☒                        | ✓                       |  |  |
| 5     | Park et al. (2009) AMJSM | ✓                          | ✓              | ✓ (spans late follicular) | ☒                  | ✓                                 | ☒                                      | ☒                        | ☒                 | ✓                       | ☒                         | ☒                        | ☒                       |  |  |
| 6     | Park et al. (2009) BJSM  | ✓                          | ✓              | ✓ (spans late follicular) | ☒                  | ✓                                 | ☒                                      | ☒                        | ☒                 | ✓                       | ☒                         | ☒                        | ☒                       |  |  |
| 7     | Shultz et al. (2012)     | ☒                          | ✓              | ✓                         | ☒                  | ☒                                 | ☒                                      | ☒                        | ☒                 | ☒                       | ☒                         | ☒                        | ☒                       |  |  |
| Study | Author                   | Methods / Outcome measures |                |                           |                    | Data collection / research design |                                        |                          |                   |                         | Population                |                          |                         |  |  |
|       |                          | Moments                    | GRF            | Kinematics                | sEMG               | Laxity                            | Familiarisation (F) or reliability (R) | Testing order randomised | Assessor blinding | Testing standardisation | Population clearly stated | MC length clearly stated | Non-HC usage > 2 months |  |  |
| 1     | Abt et al. (2007)        | ✓                          | ✓              | ✓                         | ☒                  | ☒                                 | ✓ (F)                                  | ☒                        | ☒                 | ☒                       | ☒                         | ☒                        | ☒                       |  |  |
| 2     | Chaudhari et al. (2007)  | ✓                          | ✓              | ✓                         | ☒                  | ☒                                 | ☒                                      | ☒                        | ✓                 | ☒                       | ✓                         | ☒                        | ☒                       |  |  |
| 3     | Dedrick et al. (2008)    | ☒                          | ☒              | ✓                         | ✓                  | ☒                                 | ☒                                      | ☒                        | ☒                 | ☒                       | ☒                         | ☒                        | ✓                       |  |  |
| 4     | Okazaki et al. (2017)    | ✓                          | ✓              | ✓                         | ✓                  | ☒                                 | ☒                                      | ✓                        | ☒                 | ☒                       | ☒                         | ☒                        | ☒                       |  |  |
| 5     | Park et al. (2009) AMJSM | ✓                          | ✓              | ✓                         | ☒                  | ✓                                 | ☒                                      | ☒                        | ☒                 | ☒                       | ✓                         | ☒                        | ✓                       |  |  |
| 6     | Park et al. (2009) BJSM  | ✓                          | ✓              | ✓                         | ☒                  | ✓                                 | ☒                                      | ☒                        | ☒                 | ☒                       | ☒                         | ☒                        | ✓                       |  |  |
| 7     | Shultz et al. (2012)     | ✓                          | ✓              | ✓                         | ✓                  | ✓ (F)                             | ☒                                      | ☒                        | ☒                 | ☒                       | ☒                         | ☒                        | ✓                       |  |  |

Key: MC: Menstrual cycle; HC: Hormonal contraception; GRF: Ground reaction force; sEMG: Surface electromyography; F: Familiarisation; R: Reliability

<https://doi.org/10.1371/journal.pone.0280800.t003>

**Table 4. Summary of literature that has investigated the effects of MC phase on neuromuscular and biomechanical non-contact ACL injury risk surrogates.**

| Author                     | Sample size<br>n = Population details<br>(i.e., sport, playing level,<br>age, height)<br>Population training,<br>strength, skill history                                                                                              | Population menstrual / health<br>status and length<br>MC phase method verification<br>and details                                                                                                                                                                                                                                                                                                                                                                                                                                                                                                                                                                                                                                                     | Dynamic task and methods<br>Key outcome measures /<br>variables<br>Reliability / familiarisation<br>reported (y/n)                                                                                                                                                                                                                                                                                                                                                                                                                          | Results and implications (i.e.,<br>does a certain MC phase<br>predispose athlete to greater risk<br>of injury?)                                                                                                                                                                                                                                                                                                                                                                                                                                                                                                                                           | Comments                                                                                                                                                                                                                                                                                                                                                                                                                                                                                                                                                                                                                                                                                 |
|----------------------------|---------------------------------------------------------------------------------------------------------------------------------------------------------------------------------------------------------------------------------------|-------------------------------------------------------------------------------------------------------------------------------------------------------------------------------------------------------------------------------------------------------------------------------------------------------------------------------------------------------------------------------------------------------------------------------------------------------------------------------------------------------------------------------------------------------------------------------------------------------------------------------------------------------------------------------------------------------------------------------------------------------|---------------------------------------------------------------------------------------------------------------------------------------------------------------------------------------------------------------------------------------------------------------------------------------------------------------------------------------------------------------------------------------------------------------------------------------------------------------------------------------------------------------------------------------------|-----------------------------------------------------------------------------------------------------------------------------------------------------------------------------------------------------------------------------------------------------------------------------------------------------------------------------------------------------------------------------------------------------------------------------------------------------------------------------------------------------------------------------------------------------------------------------------------------------------------------------------------------------------|------------------------------------------------------------------------------------------------------------------------------------------------------------------------------------------------------------------------------------------------------------------------------------------------------------------------------------------------------------------------------------------------------------------------------------------------------------------------------------------------------------------------------------------------------------------------------------------------------------------------------------------------------------------------------------------|
| Abt et al.<br>(2007)       | n = 10<br>Age: 21.4 ± 1.4 years;<br>height: 1.67 ± 0.06 m;<br>mass: 59.9 ± 7.4 kg<br>Physically active women<br>recruited from a local<br>university.<br>Specific sport, skill, or<br>strength training history<br>not stated.        | Eumenorrhic and ovulating.<br>MC length and frequency per<br>year not stated.<br>Phases were defined based on<br>first day of menses. Urine<br>samples collected daily starting<br>on day 10 until a positive test<br>was received using ovulation<br>detection kit. Positive test<br>indicated start of post ovulatory<br>phase.<br>Mid luteal phase was defined as<br>starting 7 days after a positive<br>ovulation test (21–23 of MC).<br>Ovulation was also confirmed by<br>screening mid-luteal<br>progesterone threshold level.<br>Testing occurred three times; on<br>day 3 of menses (early<br>follicular), 24–36 hours post-<br>positive ovulation test, mid-<br>luteal (21–23) / 7 days post<br>ovulation detection.                        | Single leg stop-jump task - 3D<br>motion and GRF analysis<br>Knee flexion and valgus angle,<br>peak proximal tibial anterior<br>shear force.<br>Knee flexion and valgus<br>moment at peak anterior tibial<br>shear force. From initial<br>contact to peak to peak knee<br>flexion / valgus.<br>One month familiarisation<br>period. No reliability measures<br>reported for outcome<br>measures.                                                                                                                                            | <ul style="list-style-type: none"> <li>• Estradiol ↑ during post-ovulatory and mid-luteal vs early follicular</li> <li>• Progesterone ↓ in early follicular and post-ovulatory</li> <li>• ↔ in knee flexion excursion, knee valgus excursion, peak proximal tibial anterior shear force, flexion moment at peak proximal tibial anterior shear force, or valgus moment at peak proximal tibial anterior shear force between MC phases.</li> <li>• No difference in knee biomechanical injury risk surrogate were found in the phases. This implies that there may not be a greater risk of ACL injury associated with one particular MC phase.</li> </ul> | Specific sport, skill, or strength training history not stated. 2 phases of MC verified. Limited number of biomechanical variables in relation to ACL examined; only knee kinetic and kinematics; ACL injury multi-segmental mechanism (i.e., hip, trunk and foot). Small sample size. MC length not stated. Testing order was non-randomised. One subject removed for anovulatory cycle. No individual analysis which may conceal differences. No reliability measures reported for outcome measures. No sEMG. No temporal analysis / coordination examined. MC phases not verified with blood samples. HC usage not confirmed. Changes were not examined relative to measurement error |
| Chaudhari<br>et al. (2007) | n = 12<br>Age: 19.1 ± 1.0 years;<br>height: 1.7 ± 0.1 m;<br>weight: 595 ± 98 N<br>Women who participated in<br>recreational sports at a<br>local university.<br>Specific sport, skill, or<br>strength training history<br>not stated. | Verified MC length for 2 cycles.<br>Women were tested twice for<br>each phase of the MC (follicular,<br>luteal, ovulatory), as determined<br>from serum analysis. Onset of<br>the ovulatory phase of the cycle<br>was determined using the PC-<br>2000 saliva testing system (I.M.<br>P., Manschau, Germany), which<br>gives a positive result 3 to 5 days<br>before ovulation. The subjects<br>used this system once a day for<br>60 days before testing.<br>Onset of luteal phase (~day 15)<br>was estimated from saliva testing<br>data, and a serum blood test for<br>estradiol, progesterone, and<br>luteinizing hormone was<br>performed. Specific dates of the<br>3 phases not provided. Testing<br>conditions standardised between<br>phases. | Bilateral horizontal jump,<br>bilateral vertical jump, and<br>unilateral drop from a 30-cm<br>box on the left leg.<br>Limited 3D motion and GRF<br>analysis—5 marker link model<br>Lower-limb kinematics (at<br>foot strike and max knee<br>flexion) and peak externally<br>applied moments were<br>calculated (hip adduction<br>moment, hip internal rotation<br>moment, knee flexion<br>moment, knee abduction<br>moment) during weight<br>acceptance.<br>No familiarisation or<br>reliability measures reported<br>for outcome measures. | <ul style="list-style-type: none"> <li>• ↔ in knee moments or knee angle between MC phases</li> <li>• No difference in knee biomechanical injury risk surrogate were found in the phases. This implies that there may not be a greater risk of ACL injury associated with one particular MC phase.</li> </ul>                                                                                                                                                                                                                                                                                                                                             | Specific sport, skill, or strength training history not stated. Small sample size. MC phases not clearly described. Unclear if non-randomised testing order was used. No individual analysis which may conceal differences. Large variability in mean/SD. Limited marker model used for 3D motion analysis. No reliability measures reported for outcome measures. No sEMG. No temporal analysis / coordination examined. MC phases not verified with ovulation kit. HC usage not confirmed. Changes were not examined relative to measurement error.                                                                                                                                    |

(Continued)

Table 4. (Continued)

| Author                | Sample size<br>n = Population details<br>(i.e., sport, playing level,<br>age, height)<br>Population training,<br>strength, skill history                                                                                                                                                                             | Population menstrual / health<br>status and length<br>MC phase method verification<br>and details                                                                                                                                                                                                                                                                                                                                                                                                                                                                                                                                                      | Dynamic task and methods<br>Key outcome measures /<br>variables<br>Reliability / familiarisation<br>reported (y/n)                                                                                                                                                                                                                                                                                                                                                            | Results and implications (i.e.,<br>does a certain MC phase<br>predispose athlete to greater risk<br>of injury?)                                                                                                                                                                                                                                                                                                                                                                                                                                                                                                                                                                                                                                                                                   | Comments                                                                                                                                                                                                                                                                                                                                                                                                                                                                                                                                                                                                                          |
|-----------------------|----------------------------------------------------------------------------------------------------------------------------------------------------------------------------------------------------------------------------------------------------------------------------------------------------------------------|--------------------------------------------------------------------------------------------------------------------------------------------------------------------------------------------------------------------------------------------------------------------------------------------------------------------------------------------------------------------------------------------------------------------------------------------------------------------------------------------------------------------------------------------------------------------------------------------------------------------------------------------------------|-------------------------------------------------------------------------------------------------------------------------------------------------------------------------------------------------------------------------------------------------------------------------------------------------------------------------------------------------------------------------------------------------------------------------------------------------------------------------------|---------------------------------------------------------------------------------------------------------------------------------------------------------------------------------------------------------------------------------------------------------------------------------------------------------------------------------------------------------------------------------------------------------------------------------------------------------------------------------------------------------------------------------------------------------------------------------------------------------------------------------------------------------------------------------------------------------------------------------------------------------------------------------------------------|-----------------------------------------------------------------------------------------------------------------------------------------------------------------------------------------------------------------------------------------------------------------------------------------------------------------------------------------------------------------------------------------------------------------------------------------------------------------------------------------------------------------------------------------------------------------------------------------------------------------------------------|
| Dedrick et al. (2008) | n = 22<br>Age: 20.5 ± 1.9 years;<br>height: 164.9 ± 5.6 cm;<br>mass: 62.1 ± 13.7 kg; and<br>Wojtys et al. [66] activity<br>scale 5.4 ± 1.4 hr/week<br>Recreationally active<br>women with no formal<br>history of jump-landing<br>training.<br>Specific sport, skill, or<br>strength training history<br>not stated. | Participants had regular menses<br>for at least one year.<br>Eumenorrhea was defined as<br>cycles occurring at regular<br>intervals ranging from 26 to 32<br>days. Cycles established for 2<br>months prior to testing.<br>MC length 28.3 ± 1.5 days.<br>Participants non-HC usage ≥ 3<br>months prior to testing.<br>Blood assays verified sex<br>hormone levels and cycle phase.<br>Random assignment of<br>participants to testing time: 11<br>subjects beginning data<br>collection in the early follicular<br>phase (day 1–3), 8 in mid-luteal<br>phase (day 21–24), and 7 in the<br>late follicular phase (day 11–13)<br>of the menstrual cycle. | Bilateral drop jumps from<br>0.5m.<br>sEMG of six muscles and<br>goniometer data for knee<br>angles. Varus/valgus knee<br>angle and sEMG activity from<br>six lower extremity muscles<br>(GM, ST, vastus lateralis,<br>vastus medialis oblique, tibialis<br>anterior, and the lateral head<br>of the gastrocnemius). Angle<br>data between initial contact<br>and 500ms of ground contact.<br>No familiarisation or<br>reliability measures reported<br>for outcome measures. | <ul style="list-style-type: none"> <li>↔ knee valgus angle or time to reach knee valgus angle between MC phases</li> <li>ST muscle exhibited onset delays relative to ground contact during mid-luteal phase, and demonstrated a significant difference in onset time between early and late follicular phases.</li> <li>Muscle timing differences between the GM and ST were decreased in the mid-luteal phases compared to early follicular phases influencing co-activation.</li> <li>↔ temporal muscle sequencing / sequential recruitment between MC phases</li> <li>MC phases appears not to influence knee valgus angle; however, may alter muscle activity (onset and timing) particularly ST and activation of GM and ST during mid-luteal phase which may increase ACL risk.</li> </ul> | Participants excluded if history of formalized jump training. Specific sport, skill, or strength training history not stated. Random assignment of cycles which is positive. Only limited number of variables examined. Only one task examined. No reliability measures reported for outcome measures. Limited number of biomechanical variables in relation to ACL injury risk examined; only knee kinematics; ACL injury multi-segment mechanism (i.e., hip, trunk and foot). No temporal analysis / coordination examined. MC phases not verified with ovulation kit. Changes were not examined relative to measurement error. |
| Okazaki et al. (2017) | n = 28<br>Age: 21.0 ± 0.8 years;<br>height: 158.1 ± 6.0 cm;<br>mass: 52.8 ± 6.5 kg<br>Specific sport, skill,<br>activity, or strength<br>training history not<br>stated.                                                                                                                                             | Healthy but MC length not<br>stated<br>Blood sample verification<br>menstrual phase (1st–5th day;<br>actually, early follicular),<br>follicular phase (7th–10th day;<br>actually, late follicular),<br>ovulation phase (12th–15th day),<br>and luteal phase (7th–9th day<br>from ovulation; actually, mid-<br>luteal).<br>MC cycles verified over 3 cycle<br>history. MC phases verified with<br>assay of serum hormonal levels.<br>The test examiner was blinded<br>to the MC of the participants.<br>Ovulation kit used to detect<br>ovulation.                                                                                                      | Unilateral drop-landing 0.30<br>m. 3D motion and GRF<br>analysis and sEMG<br>Peak GRF and time to peak<br>GRF. Hip, knee, and ankle<br>kinematics. EMG activity 150<br>ms before activity. GM, ST,<br>BF, and RF.<br>No familiarisation or<br>reliability measures reported<br>for outcome measures.                                                                                                                                                                          | Mid-luteal phase: <ul style="list-style-type: none"> <li>Time to peak GRF ↓ vs. early follicular phase (6%)</li> <li>Hip internal rotation and knee valgus ↑ vs early follicular (43% and 34%, respectively)</li> <li>Knee flexion ↓ vs early and late follicular phases (7–9%)</li> <li>Ankle dorsi-flexion ↓ vs late follicular phase (11%)</li> <li>Ankle adduction and eversion ↑ vs early and late follicular phases (26–46%, and 27–33%, respectively)</li> <li>GM ↓ activation before landing vs early and late follicular phases (20–22%)</li> <li>↔ between MC phases for BF, ST, or RF muscle activity</li> <li>Mid-luteal phase may predispose women to greater risk of non-contact ACL injury based on changes in biomechanical and NMS injury risk surrogates</li> </ul>             | Incorrect definition of MC phases, specifically stating menstrual phases. Specific sport, skill, or strength training history not stated. The examiner was blinded which is positive but unclear if testing order was randomised. No knee joint loads were examined. No reliability measures reported for outcome measures. No individual analysis which may conceal differences. No temporal analysis / coordination examined. HC usage not confirmed. Changes were not examined relative to measurement error.                                                                                                                  |

(Continued)

Table 4. (Continued)

| Author                         | Sample size<br>n = Population details<br>(i.e., sport, playing level,<br>age, height)<br>Population training,<br>strength, skill history                                                                                                       | Population menstrual / health<br>status and length<br>MC phase method verification<br>and details                                                                                                                                                                                                                                                                                                                                                                                                           | Dynamic task and methods<br>Key outcome measures /<br>variables<br>Reliability / familiarisation<br>reported (y/n)                                                                                                                                                                                                                                                                                                                                                                                                                                                                                                     | Results and implications (i.e.,<br>does a certain MC phase<br>predispose athlete to greater risk<br>of injury?)                                                                                                                                                                                                                                                                                                                                                                                                                                                                                                                                                                                                                                                                                                                                                                                                                                                                                                                                                                                                                                                                                                                                                                                                                                                                                                                                                                                                                                                                                                                                                                                                             | Comments                                                                                                                                                                                                                                                                                                                                                                                                                                                                                                                                                                                                                                                                                                                                                                                                  |
|--------------------------------|------------------------------------------------------------------------------------------------------------------------------------------------------------------------------------------------------------------------------------------------|-------------------------------------------------------------------------------------------------------------------------------------------------------------------------------------------------------------------------------------------------------------------------------------------------------------------------------------------------------------------------------------------------------------------------------------------------------------------------------------------------------------|------------------------------------------------------------------------------------------------------------------------------------------------------------------------------------------------------------------------------------------------------------------------------------------------------------------------------------------------------------------------------------------------------------------------------------------------------------------------------------------------------------------------------------------------------------------------------------------------------------------------|-----------------------------------------------------------------------------------------------------------------------------------------------------------------------------------------------------------------------------------------------------------------------------------------------------------------------------------------------------------------------------------------------------------------------------------------------------------------------------------------------------------------------------------------------------------------------------------------------------------------------------------------------------------------------------------------------------------------------------------------------------------------------------------------------------------------------------------------------------------------------------------------------------------------------------------------------------------------------------------------------------------------------------------------------------------------------------------------------------------------------------------------------------------------------------------------------------------------------------------------------------------------------------------------------------------------------------------------------------------------------------------------------------------------------------------------------------------------------------------------------------------------------------------------------------------------------------------------------------------------------------------------------------------------------------------------------------------------------------|-----------------------------------------------------------------------------------------------------------------------------------------------------------------------------------------------------------------------------------------------------------------------------------------------------------------------------------------------------------------------------------------------------------------------------------------------------------------------------------------------------------------------------------------------------------------------------------------------------------------------------------------------------------------------------------------------------------------------------------------------------------------------------------------------------------|
| Park et al.<br>(2009)<br>AMJSM | n = 26<br>Age: 22.7 ± 3.3 years;<br>height: 170.1 ± 7.1 cm;<br>mass: 65.0 ± 9.6 kg<br>Recreationally active<br>women who played<br>Sports—activity levels<br>8.7 ± 4.6 hr/week<br>Specific sport, skill, or<br>strength history not<br>stated. | MC length: 28.9 ± 2.7 days<br>Follicular (Early) (3–7),<br>ovulation (24–48 hours after<br>detection of oestrogen surge—<br>ovulation kit) and luteal (mid-<br>luteal) (~7 days post ovulation)<br>phases—serum hormone.<br>Non-randomised order. Blood<br>samples collected at 3 time<br>points to verify.<br>Timing of the third test varied<br>and ranged between 19 and 26<br>days (22.85 ± 3.22 days)<br>depending on the length of the<br>participants' MC. Participants<br>non-HC usages ≥ 3 months. | 45° pre-planned cut (CUT45);<br>target speed 3.5 m/s. 3D<br>motion and GRF analysis<br>Bilateral jump and stop action<br>—self-selected speed and kept<br>consistent between sessions.<br>3D motion and GRF analysis<br>Knee laxity—KT-2000<br>arthrometer 89N and<br>compared 3D data between<br>participants with low,<br>medium, and high laxity<br>Knee laxity (mm), peak knee<br>angle, and knee joint moment<br>(Nm) and knee joint impulse<br>(Nms). Internal knee<br>adduction, knee flexion, and<br>int/ext rotation moment<br>during stance phase.<br>Reliability measures reported<br>for knee laxity only. | <ul style="list-style-type: none"> <li>• ↔ for any parameter for both tasks between MC phases</li> <li>• Of the 26 participants, 13 showed the lowest knee laxity during the early follicular phase; 3 were lowest during ovulation, and 10 lowest during mid-luteal phase. 14 of 26 participants displayed highest knee laxity during ovulation compared with 10 participants during the early follicular phase and only 2 participants during the mid-luteal phase.</li> <li>• ↑ CUT45 knee adduction (valgus) impulse (0.31 ± 0.30 Nms) in high vs low knee laxity group (0.22 ± 0.21 Nms).</li> <li>• ↑ jump-stop knee adduction moment (49.77 ± 23.05 Nm) in high vs medium knee laxity group (40.23 ± 20.42 N·m).</li> <li>• ↑ jump-stop knee external rotation moment and impulse in high vs low knee laxity group (external rotation impulse: 0.47 ± 0.42 Nms vs 0.27 ± 0.27 Nms; external rotation moment: 8.28 ± 4.45 N·m vs 6.04 ± 3.51 N·m) during jumping and stopping.</li> <li>• 1.3-mm difference in knee laxity ↑ ~30% in knee adduction impulse during CUT45, ↑ ~20% in knee adduction moment, and ↑ ~ 20–45% external rotation loads for jump-stop</li> <li>• No specific MC phases predisposes women to greater risk, rather the phases produce variations in knee laxity, with increases in laxity increasing multiplanar knee joint loads and potential ACL injury risk.</li> <li>• Higher knee laxity associated with increased multiplanar knee joint loads. However, variation in the MC phase where the highest and lowest laxity observed.</li> <li>• Thus, group analysis is potentially masking differences. Clear individual variation in laxity and subsequent knee joint loading</li> </ul> | Examined two tasks which is positive. Specific sport, skill, or strength training history not stated. Non-randomised testing order which introduces potential order effect. 3D motion analysis using limited marker set. Only one cutting angle examined at a low entry speed. Limited number of biomechanical variables in relation to ACL examined; only knee kinematics; ACL injury multi-segment mechanism (i.e., hip, trunk and foot). No temporal analysis / coordination. Group analysis masked out differences due to positive and negative responders. No reliability measures reported for outcome measures. Early follicular phase slightly spans later follicular MC phase classification according to McNulty et al. [24]. No sEMG. Changes were not examined relative to measurement error. |

(Continued)

Table 4. (Continued)

| Author                        | Sample size<br>n = Population details<br>(i.e., sport, playing level,<br>age, height)<br>Population training,<br>strength, skill history                                                                     | Population menstrual / health<br>status and length<br>MC phase method verification<br>and details                                                                                                                                                                                                                                                                                                                      | Dynamic task and methods<br>Key outcome measures /<br>variables<br>Reliability / familiarisation<br>reported (y/n)                                                                                                                                                                                                                                                                                               | Results and implications (i.e.,<br>does a certain MC phase<br>predispose athlete to greater risk<br>of injury?)                                                                                                                                                                                                                                                                                                                                                                                                                                                                                                                                                                                                                                                                                                                                                                                                                                                                                                                                                                                                                                                                                                                                                                                                                                                                                                                                                                                                                                                                                                                                                                                                                                               | Comments                                                                                                                                                                                                                                                                                                                                                                                                                                                                                                                                                                                                                                                                                                                        |
|-------------------------------|--------------------------------------------------------------------------------------------------------------------------------------------------------------------------------------------------------------|------------------------------------------------------------------------------------------------------------------------------------------------------------------------------------------------------------------------------------------------------------------------------------------------------------------------------------------------------------------------------------------------------------------------|------------------------------------------------------------------------------------------------------------------------------------------------------------------------------------------------------------------------------------------------------------------------------------------------------------------------------------------------------------------------------------------------------------------|---------------------------------------------------------------------------------------------------------------------------------------------------------------------------------------------------------------------------------------------------------------------------------------------------------------------------------------------------------------------------------------------------------------------------------------------------------------------------------------------------------------------------------------------------------------------------------------------------------------------------------------------------------------------------------------------------------------------------------------------------------------------------------------------------------------------------------------------------------------------------------------------------------------------------------------------------------------------------------------------------------------------------------------------------------------------------------------------------------------------------------------------------------------------------------------------------------------------------------------------------------------------------------------------------------------------------------------------------------------------------------------------------------------------------------------------------------------------------------------------------------------------------------------------------------------------------------------------------------------------------------------------------------------------------------------------------------------------------------------------------------------|---------------------------------------------------------------------------------------------------------------------------------------------------------------------------------------------------------------------------------------------------------------------------------------------------------------------------------------------------------------------------------------------------------------------------------------------------------------------------------------------------------------------------------------------------------------------------------------------------------------------------------------------------------------------------------------------------------------------------------|
| Park et al.<br>(2009)<br>BJSM | n = 25<br>Age: 22.7 ± 3.5 years,<br>170.2 ± 7.0 cm, 64.7 ± 9.6<br>kg<br>Sports at recreational<br>level—activity levels<br>8.7 ± 4.6 hr/week<br>Specific sport, skill, or<br>strength history not<br>stated. | MC length: 28.9 ± 2.8 days<br>Follicular (5–8) (Spans both<br>early and late according to<br>McNulty's et al's [24]<br>classification), ovulation (24–48<br>hours after detection of<br>oestrogen surge—ovulation kit)<br>and luteal (~7 days post 2nd test;<br>mid-luteal)—serum hormone.<br>Non-randomised order. Blood<br>samples collected at 3 time<br>points to verify. Participants<br>non-HC usages ≥ 3months. | 45° pre-planned cut; target<br>speed 3.5 m/s. 3D motion and<br>GRF analysis<br>Knee laxity—KT-2000<br>arthrometer 89N<br>Knee laxity (mm), peak knee<br>angle and knee joint moment<br>(Nm) and knee joint impulse<br>(Nms). Internal knee<br>adduction, knee flexion, and<br>int/ext rotation moment<br>during stance phase.<br>No familiarisation or<br>reliability measures reported<br>for outcome measures. | <ul style="list-style-type: none"> <li>• ↑ knee laxity in ovulation vs. mid-luteal phase, but ↔ knee joint mechanics between MC phases.</li> <li>• Positive correlation between Δ knee laxity and Δ knee joint loads (moment or impulse) from follicular phase to ovulation (<math>r = 0.523</math>), and ovulation to mid-luteal luteal phase (<math>r = 0.526</math>)</li> <li>• Positive correlations between Δ laxity and Δ knee internal rotation impulse, and Δ laxity and Δ knee adduction impulse from ovulation to the luteal phase (<math>r = 0.450</math>) and (<math>r = 0.408</math>)</li> <li>• 15 women with ↑ knee laxity from follicular to ovulation phases showed tendency to ↑ knee joint loads (adduction / impulse), whereas other 10 with ↓ knee laxity, showed a tendency to ↓ knee joint loads.</li> <li>• 20 women whose knee laxity ↓ from ovulation to mid-luteal phase showed a tendency to ↓ knee joint loads (internal rotation moment and impulse and adduction impulse), whereas the other five, whose knee laxity ↑, showed a tendency to ↑ knee loads.</li> <li>• Women whose knee laxity ↑ between MC phases showed ↑ knee joint loads, and women whose knee laxity ↓ showed ↓ knee joint loads.</li> <li>• 1–3 mm Δ knee laxity during the MC caused a 3–4 Nm Δ internal rotation moments and 40–50 Nm Δ adduction moments.</li> <li>• No specific MC phase predisposes females to greater risk of ACL injury based on biomechanical risk injury risk surrogates.</li> <li>• Changes in laxity associated with change in KJL—due to MC phase hormonal changes (positive = positive / negative = negative). However, considerable variability in changes (magnitude and direction) in laxity across MC phases.</li> </ul> | Specific sport, skill, or strength training history not stated. Non-randomised testing order. 3D motion analysis with limited marker set. Only one cutting angle examined at a low entry speed. Limited number of biomechanical variables in relation to ACL injury risk examined; only knee kinematics; ACL injury multi-segment mechanism (i.e., hip, trunk and foot). No temporal analysis / coordination. Group analysis masked out differences due to positive and negative responders. No reliability measures reported for outcome measures. Follicular phase spans early and later follicular MC phase classification according to McNulty et al. [24] No sEMG. Changes were not examined relative to measurement error |

(Continued)

Table 4. (Continued)

| Author                  | Sample size<br>n = Population details<br>(i.e., sport, playing level,<br>age, height)<br>Population training,<br>strength, skill history                                                             | Population menstrual / health<br>status and length<br>MC phase method verification<br>and details                                                                                                                                                                                                                                                                                                                     | Dynamic task and methods<br>Key outcome measures /<br>variables<br>Reliability / familiarisation<br>reported (y/n)                                                                                                                                                                                                                                                                                                                                                                                                                                                                                                                           | Results and implications (i.e.,<br>does a certain MC phase<br>predispose athlete to greater risk<br>of injury?)                                                                                                                                                                                                                                                                                                                                                                                                                                                                                                                                                               | Comments                                                                                                                                                                                                                                                                                                                                                                                                 |
|-------------------------|------------------------------------------------------------------------------------------------------------------------------------------------------------------------------------------------------|-----------------------------------------------------------------------------------------------------------------------------------------------------------------------------------------------------------------------------------------------------------------------------------------------------------------------------------------------------------------------------------------------------------------------|----------------------------------------------------------------------------------------------------------------------------------------------------------------------------------------------------------------------------------------------------------------------------------------------------------------------------------------------------------------------------------------------------------------------------------------------------------------------------------------------------------------------------------------------------------------------------------------------------------------------------------------------|-------------------------------------------------------------------------------------------------------------------------------------------------------------------------------------------------------------------------------------------------------------------------------------------------------------------------------------------------------------------------------------------------------------------------------------------------------------------------------------------------------------------------------------------------------------------------------------------------------------------------------------------------------------------------------|----------------------------------------------------------------------------------------------------------------------------------------------------------------------------------------------------------------------------------------------------------------------------------------------------------------------------------------------------------------------------------------------------------|
| Shultz et al.<br>(2012) | n = 71<br>Recreationally active<br>women (2.5–10 hrs/week)<br>for 3 months prior. Other<br>anthropometrics not<br>reported.<br>Specific sport, skill, or<br>strength training history<br>not stated. | Nulliparous—self reported MC<br>length (26–32 days) ± 1 day<br>Ovulation kit to verify ovulation.<br>Early follicular (up to 6 days<br>after menses) and mid-luteal (8–<br>10 consecutive days after<br>ovulation).<br>Testing performed on days<br>based on two time points where<br>knee laxity was highest (T2) and<br>lowest (T1) which coincided<br>with these periods. Participants<br>non-HC usages ≥ 3months. | Bilateral drop-jump from 0.45<br>m. 3D motional and GRF<br>analysis with sEMG<br>(quadriceps, hamstrings,<br>gastrocnemius).<br>Knee laxity—KT-2000<br>arthrometer 133N.<br>Electromagnetic position<br>sensors (Ascension<br>Technology Corp, Burlington,<br>VT) 10 Nm varus/valgus<br>torque and 5Nm internal-<br>external torque)<br>Sagittal, frontal, and transverse<br>kinetics and kinematics.<br>Muscle pre- landing and post-<br>landing activation. Full<br>temporal analysis.<br>Participants' familiarisation 2<br>weeks prior to testing.<br>Reliability for laxity<br>measurements and landing<br>duration only—male data only | <ul style="list-style-type: none"> <li>• Sub-group of women who ↑<br/>both sagittal and frontal plane<br/>laxity from T1 to T2 (cluster 3<br/>and 4) had greater relative net<br/>change toward knee valgus of<br/>3.7- to 5.2° compared with<br/>clusters who did not increase<br/>sagittal and frontal plane laxity<br/>(cluster 1).</li> <li>• ↔ in muscle activation and<br/>moments between time points.</li> <li>• Women who demonstrate<br/>changes in anterior and frontal<br/>laxity may display more valgus<br/>motion; however, moments and<br/>muscle activity do not change<br/>across MC phases which<br/>ultimately contributes to ACL<br/>loading.</li> </ul> | Specific sport, skill, or<br>strength training history not<br>stated. Large sample size<br>which is positive. No<br>reliability measures reported<br>for outcome measures.<br>Temporal analysis conducted<br>which is a positive of study.<br>Unclear if testing order was<br>randomised. MC phases not<br>verified with blood samples.<br>Changes were not examined<br>relative to measurement<br>error |

Key: Anterior cruciate ligament; GRF: Ground reaction force; sEMG: Surface electromyography; MC menstrual cycle; 3D: Three-dimensional; GM: Gluteus maximus; ST: Semitendinosus; BF: Biceps femoris; RF: Rectus femoris; SD: Standard deviation; NMS: neuromuscular; CUT45: 45° pre-planned cut. ↑: significantly greater / higher / increase ( $p < 0.05$ ); ↓: significantly lower / lesser / decrease ( $p < 0.05$ ); ↔ no significant change or difference ( $p > 0.05$ )

<https://doi.org/10.1371/journal.pone.0280800.t004>

[35, 64] showed evidence that the mid-luteal phase may predispose women to greater risk of non-contact ACL injury compared to early or late follicular phases. Importantly, the MC influenced knee laxity [33, 34, 63], with two studies [33, 34] demonstrating MC attributed changes in knee laxity were associated with changes in KJL (i.e., increase in laxity associated with increase in KJL) and thus potential ACL injury risk [9, 47, 52]. However, considerable individual variation (i.e., magnitude and direction) was observed with respect to the MC phase which elicited the greatest knee laxity and KJL [33, 34]. Finally, the research in this review was low to very low in methodological quality, with significant methodological and research design limitations which should be acknowledged when interpreting the findings and improved in future research. A comprehensive overview regarding the methodological and research design limitations, considerations, and recommendations for future research are presented in Table 5.

#### 4.1 Evidence showing MC phase has no effect on ACL neuromuscular or Neuromuscular injury risk surrogates

Four studies [33, 34, 62, 65] reported no significant differences in neuromuscular or biomechanical (anterior tibial shear, KJL or knee valgus) ACL injury risk surrogates between MC phases during jump-landing. Similarly, two studies revealed no biomechanical differences in knee injury risk surrogates during 45° cutting [33, 34] or stop-jump actions [33] between MC phases. Thus, in line with GRADE interpretation, there is very low level of evidence which potentially implies that no specific MC phase elevates non-contact ACL injury risk based on

**Table 5. Limitations and considerations of the synthesised research pertaining to the effect of the MC on ACL neuromuscular and biomechanical injury risk surrogates.**

| Limitations and considerations                                                                                                                                                                                                                                                                                                                                                                                                                                                                                                                                                                                                                                                                                                                                                                                                                                                                                                                                                                                                                                                                                                                                                                                                | Recommendations                                                                                                                                                                                                                                                                                                                                                                                   |
|-------------------------------------------------------------------------------------------------------------------------------------------------------------------------------------------------------------------------------------------------------------------------------------------------------------------------------------------------------------------------------------------------------------------------------------------------------------------------------------------------------------------------------------------------------------------------------------------------------------------------------------------------------------------------------------------------------------------------------------------------------------------------------------------------------------------------------------------------------------------------------------------------------------------------------------------------------------------------------------------------------------------------------------------------------------------------------------------------------------------------------------------------------------------------------------------------------------------------------|---------------------------------------------------------------------------------------------------------------------------------------------------------------------------------------------------------------------------------------------------------------------------------------------------------------------------------------------------------------------------------------------------|
| Sample sizes are generally low and not justified ( $n = 10-28$ ) [33–35, 62, 64, 65] with no <i>a priori</i> statistical power or sample size estimates calculated. Studies are likely underpowered which increases the risk of type II error [91], significant effects are likely to overestimate population effects sizes [91], have lower precision [91], and are less likely to be true and reproducible [92].                                                                                                                                                                                                                                                                                                                                                                                                                                                                                                                                                                                                                                                                                                                                                                                                            | Greater sample sizes with <i>a priori</i> sample size estimation and rationale are needed to ensure study is sufficiently powered. Researchers are advised to explicitly state the method for calculating statistical power (software, inputs etc.) and specify the chosen test to delineate the given effect size [91] or clearly state the sample size estimation method.                       |
| Participant characteristics are generally poorly described and limited to recreational or physically active women. Across all studies, none provided any information pertaining to specific sports, skill level, or resistance training history. This omission is key because skill level, training history, and physical capacity can influence movement strategy [93–97]. Additionally, not all women are the same, as more experienced naturally menstruating / eumenorrheic sportswomen can have different hormonal profiles concentrations compared to untrained women which is likely to influence physiology and subsequent performance [98].                                                                                                                                                                                                                                                                                                                                                                                                                                                                                                                                                                          | Better reporting of participant characteristics, particularly in relation to specific sports, skill level, or resistance training history [93], and further investigations into the effect of MC on ACL injury risk surrogates in a range of different sporting populations and skill levels is needed, particularly in elite populations.                                                        |
| Most studies investigated jump-landing tasks, using generally one or two tasks to evaluate potential injury risk. Additionally, only two studies examined a COD task, but this was limited to a 45° side-step cutting task only [33, 34]. Athletes' biomechanical injury risk profiles are task dependent [79–82] and importantly, a wide range of COD actions are performed in sport [99, 100] which are linked to ACL injuries including crossover cuts, split steps, shuffle steps, and pivots / turns. Additionally, the biomechanical demands of COD are angle and velocity dependent [80, 101], which have distinct implications on the technical execution, muscle activation, kinetic and kinematics, and KJLs. Thus, investigating only one COD angle only provides insight into an athlete's ability to COD at the specific angle and action. No study examined penultimate foot contact braking strategies which can play an important role in COD [102, 103], and no study examined a deceleration task: a key mechanism of ACL injury [104–107].                                                                                                                                                                 | Further research using a range of different tasks such as jump-landing, COD, and deceleration actions, with considerations of the angle-velocity trade-off during COD.                                                                                                                                                                                                                            |
| Majority of studies have focused on lower-limb biomechanics, particularly the knee, and have failed to explore the hip, trunk, and ankle kinetics or kinematics [33, 34, 62, 65]. This is important because the ACL injury mechanism and loading is multi-segmental [46, 52, 77, 78].                                                                                                                                                                                                                                                                                                                                                                                                                                                                                                                                                                                                                                                                                                                                                                                                                                                                                                                                         | Comprehensive whole-body analysis is needed when exploring the effect of the MC on neuromuscular and biomechanical ACL injury risk surrogates.                                                                                                                                                                                                                                                    |
| Three studies examined neuromuscular activity using sEMG techniques during abovementioned tasks [35, 63, 64]. Alternatively, high density sEMG can provide more detailed insights into the spatial distribution of activity and muscle coordination which can help understand how specific neuromuscular activity patterns affect movement quality, strategy, and potential KJLs.                                                                                                                                                                                                                                                                                                                                                                                                                                                                                                                                                                                                                                                                                                                                                                                                                                             | Further research is needed using high density sEMG in addition to bipolar, which can provide novel insights into whether the MC alters the muscle coordination and spatial distribution of activity which can therefore affect movement quality, strategy, and potential knee joint loading and subsequent ACL injury risk.                                                                       |
| Only one study randomised the order of testing across MC phases [64], only one study clearly stated that testing conditions (extraneous factors) were standardised between MC phases [65], while one study confirmed that the examiner was blinded to MC phase [35]. The lack of randomisation introduces the potential for order / learning / familiarisation effects, while the lack of blinding can introduce issues with bias. The lack of testing standardisation (extraneous factors) between MC phases can influence physiological functions and concentrations of reproductive hormones attributed to changes in circadian rhythm (time of day), diet and nutritional supplementation, prior exercise, alcohol and consumption and smoking [25, 29].                                                                                                                                                                                                                                                                                                                                                                                                                                                                  | Future research should ensure that: 1) randomised or counterbalanced testing order is adopted; 2) that the assessor is blinded to the MC phase; and 3) ensure that extraneous factors are standardised when conducting repeated measures / longitudinal testing.                                                                                                                                  |
| Majority of studies fail to conduct individual analysis, and generally determine the effect of the MC on neuromuscular and biomechanical injury risk surrogates based on group analysis. Because not all women are the same, and the MC can result in inter-individual variations in physiological and hormonal responses [25–27], inferences based on group means only may conceal potentially meaningful information [108–110]; thus, the monitoring of individual changes and identification of positive-, non- and negative responders, would provide further insight into the effect of the MC on injury risk and performance. These individual changes should be interpreted relative to measurement error, SDD, or SWC as adopted in recently published literature [110–112]. Finally, most data are presented in tabular or column chart format, and individual data is not provided in figures. This reduces data transparency, and does not allow researchers to examine the variability and distribution within the data, identify outliers, and examine trends in the individual changes in outcome variables between the MC phases [113]. This is of particular importance when working with small sample sizes. | In addition to group analysis, researchers are encouraged to conduct individual analysis, monitoring positive, negative and non-responders. Ideally, when monitoring changes, these should also be interpreted relative to measurement error, SDD, or SWC. Finally, data transparency is advocated, and researchers should present their individual data, such as using univariate scatter plots. |

(Continued)



Table 5. (Continued)

| Limitations and considerations                                                                                                                                                                                                                                                                                                                                                                                                                                                                                                                                                                                                                                                                                                                                                                                                                                                                                                                                                                      | Recommendations                                                                                                                                                                                                                                                                                                                                                                                                                                                                                                                                                                                                                                      |
|-----------------------------------------------------------------------------------------------------------------------------------------------------------------------------------------------------------------------------------------------------------------------------------------------------------------------------------------------------------------------------------------------------------------------------------------------------------------------------------------------------------------------------------------------------------------------------------------------------------------------------------------------------------------------------------------------------------------------------------------------------------------------------------------------------------------------------------------------------------------------------------------------------------------------------------------------------------------------------------------------------|------------------------------------------------------------------------------------------------------------------------------------------------------------------------------------------------------------------------------------------------------------------------------------------------------------------------------------------------------------------------------------------------------------------------------------------------------------------------------------------------------------------------------------------------------------------------------------------------------------------------------------------------------|
| No study reported reliability measures for their biomechanical or neuromuscular data, and only two studies stated a familiarisation session(s) / period [62, 63] was performed. Reliability is central in order to establish confidence in the data collection, analysis, and participant's performance of the task, and to determine whether the data is stable, consistent, accurate, and valid. Unfortunately, most investigations failed to report reliability measures, and evidence has shown that injury risk surrogates, such as KJLs, can be susceptible to variability between sessions [114–116].                                                                                                                                                                                                                                                                                                                                                                                        | Ensure participants are adequately familiarised with the testing protocols and ensure the reliability measures are reported to ensure data collected is stable, accurate, and valid. This will also result in greater data transparency and research quality.                                                                                                                                                                                                                                                                                                                                                                                        |
| No study examined joint-joint coordination changes between MC phases [33–35, 62–65]. Examinations of joint-joint coordination; angle-angle plots; position-velocity plots, will provide further insight into coupling behaviours and movement strategy and execution during high intensity tasks [117–119]. Only one study included a form of temporal analysis [63] while the remaining studies generally conducted discrete point analysis [33–35, 62, 64, 65]. This approach can lead to regional focus bias, whereby a large amount of data are discarded from the entire waveform [120–124]; thus, valuable information across the whole curve is unexamined because only a single data point is examined [125, 126]. Additionally, discrete point analysis does not consider the position of the key measures (i.e., differences in timing); for example, trial peaks may occur at different timings along the waveform and thus, the temporal organisation of the pattern is lost [127–129]. | Future research should consider examining coordination changes in movement between MC phases to establish if the MC alters movement strategy and coupling behaviours between multiple segments. In addition to discrete point analysis, future research should conduct full temporal analysis of the full waveform, using statistical approaches such as statistical parametric mapping [114, 130–132] or temporal phase analysis [133–135]. Conducting such analysis could provide further insight not only into the magnitude of differences, but importantly provide more detail into where these differences occur across the whole time-series. |

**Key:** COD: Change of direction; MC: menstrual cycle; ACL: anterior cruciate ligament; KJL: knee joint load; SWC: smallest worthwhile change; SDD: smallest detectable difference. sEMG: surface electromyography.

<https://doi.org/10.1371/journal.pone.0280800.t005>

biomechanical surrogates. The lack of differences in biomechanical ACL injury risk surrogates between ovulation and mid-luteal phases, speculatively, could be attributed to similar, high concentrations of oestrogen which may have comparable effects on ligament and tendon properties, neuromuscular control, and thus potential injury risk [67].

Although Chaudhari et al. [65] standardised testing conditions when comparing biomechanics between MC phases, the phase descriptions were unclear (i.e., failed to specify day that MC phase coincided with); therefore, making it difficult to verify and ascertain whether accurate MC phases were identified [24, 25]. Additionally, Park et al. [33, 34] identified the early follicular phase, using a date range that spans both early and late follicular phase according to recent descriptions [24, 25]. This approach may lead to the grouping of non-homogeneous participants and potential inaccurate evaluation regarding the influence of the MC [25]. The sample sizes used in the studies are generally small ( $n = 10–28$ ) and likely underpowered. Two studies stated the testing order was non-randomised [62, 65], while two studies did not clearly describe whether randomised testing occurred [33, 34]. Thus, the lack of differences observed between MC phases by researchers [33, 34] could be influenced by a learning or order effect, potentially confounding the observations. Based on current evidence, methodological, and research design limitations, practitioners should be cautious manipulating their injury mitigation, screening, and physical preparation strategies based on the MC for female athletes.

#### 4.2 Evidence showing mid-luteal phase may increase ACL injury risk based on neuromuscular or biomechanical injury risk surrogates

Two studies [35, 64] indicated that the mid-luteal phase may predispose women to greater non-contact ACL injury risk compared to other phases based on biomechanical (i.e., kinematics linked to greater KJLs) [35] and neuromuscular (i.e., reduced gluteal activation [35] or delayed semitendinosus activation which could increase anterior tibial shear [64]) surrogates

during drop-landing tasks. This delay, speculatively, could be attributed to significant increases in progesterone compared to other phases (i.e., follicular and ovulation) which can elicit nervous system inhibitory effects [68, 69]. Importantly, however, minimal differences were observed in onset timing for other lower-limb muscles by Dedrick et al. [64]. Nonetheless, these studies have either blinded the assessor [35] or randomised testing [64], thus reducing bias.

Okazaki et al. [35] and Dedrick et al. [64] did not examine KJLs, a key ACL loading surrogate [48, 70–72]. Akin to previous studies [33, 34, 62, 65], reliability measures were not reported for the outcome measures, while changes in measures were not interpreted relative to measurement error. This raises questions as to whether observed muscle activity [64] and joint kinematic [35] changes were due to error (i.e., neuromuscular or movement variability and measurement error) or truly attributable to MC influenced hormonal changes. Further research is needed which examines the effect of the MC on neuromuscular and biomechanical ACL injury risk surrogates, particularly KJLs, accounting for measurement error when interpreting changes between MC phases.

### 4.3 Evidence supporting an effect of MC on knee laxity and subsequent knee joint loads

While the MC's effect on neuromuscular and biomechanical ACL injury risk surrogates appears inconclusive, three studies [33, 34, 63] demonstrated changes in knee laxity between different MC phases which were accompanied with changes in potentially hazardous biomechanics associated with ACL loading. Park et al. [33, 34] reported no differences in KJLs between MC phases, but measured knee laxity at each MC phase. Interestingly, women with higher knee laxity [33], and increases in laxity between MC phases [34], were associated with greater KJLs during cutting or stop-jumping. These findings [33, 34] may help explain why prospective research has identified an association between knee laxity and non-contact ACL injury [73, 74]. However, the MC phase which produced the greatest knee laxity and subsequent KJL was inconsistent between women (see Table 4), and thus an individualised approach to laxity, neuromuscular, and biomechanical monitoring is advised.

Collectively, this research indicates no specific MC phase predisposes women to greater risk of ACL injury based on biomechanical injury risk surrogates or knee laxity [33, 34]; however, the changes in laxity associated with MC phase hormonal changes produces a problematic laxity effect for KJLs and potential ACL injury risk. Notably, considerable variability in the changes (i.e., magnitude and direction) in laxity and its effect on KJLs was observed across MC phases which could be attributed to intra- and inter-individual-variation in the magnitude and rate of change in ovarian hormonal concentrations which influences laxity [75]. Additionally, genetic variation between individuals and differential expression of oestrogen receptors may affect oestradiol's ( $E_2$ ) ability to bind to its receptor, potentially varying oestrogen-attributed physiological responses in musculoskeletal connective tissue, thus laxity responses [76].

Caution is advised regarding the aforementioned research [33, 34] as some definitions and classifications for the early follicular phase are different to recent MC classifications [24, 25], spanning both early and late phases (i.e., 5–8 days and 3–7 days). Additionally, similar to aforementioned studies [33, 34, 62, 65], only knee joint kinetics and kinematics were examined [33, 34], with other segments and joints (trunk, hip, and ankle), and neuromuscular activity also unexamined. This absence is important because the ACL injury mechanism and loading is multi-segmental [46, 52, 77, 78], and neuromuscular activity patterns has the potential to unload [55] or increase ACL loading [56–59]. Conversely, in a larger sample size, previous work [63] reported that women who demonstrate changes in anterior and frontal knee laxity

may display more valgus motion during bilateral drop vertical jumping; however, KJL and muscle activity did not change across phases which ultimately contributes to ACL loading and injury risk [47, 55]. Although difficult to rationalise these contrasting observations with Park et al. [33, 34], athletes' biomechanical injury risk profiles are task dependent [79–82]; thus, caution is advised generalising the conclusions regarding the role of the MC and biomechanical and neuromuscular injury risk surrogates when only a limited number of tasks have been investigated.

Although there is no consistent MC effect on knee laxity, MC hormonal perturbations can both increase and decrease women's knee laxity at each MC phase. Therefore, monitoring female athletes' knee laxity changes could be a viable strategy to infer potential KJLs changes and potential ACL injury risk throughout the MC. This can be done using an arthrometer [33, 34, 83, 84], rolimeter [85, 86], ultrasound [87], radiography [88], or wearable accelerometers [84].

## 5. Limitations, considerations, and future recommendations for research

Recently suggested [75], greater emphasis should be placed on exploring the effect of hormonal concentrations (i.e., magnitude, relative and / or rate of change from baseline) rather than focusing on the MC phase's effect on performance or injury risk, because the change in hormonal contribution ultimately affects the physiological system. Further research is needed to understand how hormonal, neuromuscular, and biomechanical ACL injury risk factors interrelate and influence joint laxity and movement execution of dynamic tasks at different MC phases, whilst considering hormonal concentrations.

There is significant underrepresentation of female athletes in sports and exercise medicine research [23, 89, 90]. Researchers often avoid investigating women due to the MC associated physiological changes and the potential methodological difficulties [25]. The limited published literature synthesised during this review is insightful and provides unique, important information from an underrepresented population. We have, however, highlighted some methodological and research design limitations, and have suggested some future recommendations for research to build on the insightful body of work to improve research quality. Consequently, this has led to recent recommendations for more research into female athletes [23, 25, 26], particularly more rigorous research designs when exploring the MC's effect in relation to potential injury risk and exercise performance [25, 26]. Therefore, future investigations which follow this review and other researchers' suggestions [25, 26, 29], accounting for the methodological and research design limitations, will produce greater methodological quality and higher-quality data in women. This will permit fairer and more accurate conclusions regarding the MC's effect on ACL injury risk.

Strengths of this systematic review included the comprehensive search strategy conforming with PRISMA, adopting the PICOS strategy to permit the synthesis of methodology and study findings. Additionally, methodological quality was assessed using a modified Downs and Black checklist [24], though this version has not been validated. Overall quality of evidence was evaluated using the GRADE approach, but due to the heterogeneity, quantitative statistical analysis and a meta-analysis could not be performed. Finally, this review was not pre-registered which can increase risk of bias (i.e., collating and synthesis of research, selective reporting, overall transparency, duplication, research waste).

## 6. Conclusion

Based on this review, it is inconclusive whether a particular MC phase predisposes eumenorrheic and naturally menstruating women to greater non-contact ACL injury risk based on

neuromuscular and biomechanical surrogates, with mixed findings observed. Interestingly, knee laxity was affected by the MC, with evidence that MC attributed changes in knee laxity were associated with changes in KJL and thus potential ACL injury risk. However, considerable individual variation (i.e., magnitude and direction) was observed with respect to the MC phase which elicited the greatest knee laxity and KJL. Nonetheless, monitoring changes in knee laxity in female athletes could be a viable strategy to infer potential changes in KJLs and ACL injury risk. Research synthesised in this review was low to very low in methodological quality, contributing to a very low quality of evidence, which could be improved with respect to design and execution. As such, it is difficult to make definitive conclusions regarding the effects of the MC phase on ACL neuromuscular and biomechanical injury risk surrogates, and thus practitioners should be cautious manipulating their physical preparation, injury mitigation, and screening practises based on current evidence.

## Supporting information

**S1 Checklist. PRISMA 2020 checklist.**  
(TIF)

## Author Contributions

**Conceptualization:** Thomas Dos'Santos, Georgina K. Stebbings, Andy Sanderson.

**Formal analysis:** Thomas Dos'Santos, Medha Shashidharan, Katherine A. J. Daniels, Andy Sanderson.

**Investigation:** Thomas Dos'Santos, Medha Shashidharan, Andy Sanderson.

**Methodology:** Thomas Dos'Santos, Georgina K. Stebbings, Christopher Morse, Medha Shashidharan, Andy Sanderson.

**Project administration:** Thomas Dos'Santos.

**Writing – original draft:** Thomas Dos'Santos, Georgina K. Stebbings, Christopher Morse, Katherine A. J. Daniels, Andy Sanderson.

**Writing – review & editing:** Thomas Dos'Santos, Georgina K. Stebbings, Christopher Morse, Medha Shashidharan, Katherine A. J. Daniels, Andy Sanderson.

## References

1. Voskanian N. ACL Injury prevention in female athletes: review of the literature and practical considerations in implementing an ACL prevention program. *Current reviews in musculoskeletal medicine*. 2013; 6(2):158–63. <https://doi.org/10.1007/s12178-013-9158-y> PMID: 23413024
2. Montalvo AM, Schneider DK, Webster KE, Yut L, Galloway MT, Heidt RS Jr, et al. Anterior cruciate ligament injury risk in sport: a systematic review and meta-analysis of injury incidence by sex and sport classification. *J Athl Training*. 2019; 54(5):472–82. <https://doi.org/10.4085/1062-6050-407-16> PMID: 31009238
3. Parsons JL, Coen SE, Bekker S. Anterior cruciate ligament injury: towards a gendered environmental approach. *Br J Sports Med*. 2021. <https://doi.org/10.1136/bjsports-2020-103173> PMID: 33692033
4. Fox A, Bonacci J, Hoffmann S, Nimphius S, Saunders N. Anterior cruciate ligament injuries in Australian football: should women and girls be playing? You're asking the wrong question. *BMJ open sport & exercise medicine*. 2020; 6(1):e000778. <https://doi.org/10.1136/bmjsem-2020-000778> PMID: 32341803
5. Sanders TL, Maradit Kremers H, Bryan AJ, Larson DR, Dahm DL, Levy BA, et al. Incidence of anterior cruciate ligament tears and reconstruction: a 21-year population-based study. *Am J Sport Med*. 2016; 44(6):1502–7. <https://doi.org/10.1177/0363546516629944> PMID: 26920430

6. Zbrojkiewicz D, Vertullo C, Grayson JE. Increasing rates of anterior cruciate ligament reconstruction in young Australians, 2000–2015. *Medical Journal of Australia*. 2018; 208(8):354–8. <https://doi.org/10.5694/mja17.00974> PMID: 29669497
7. Eime R, Charity M, Harvey J, Westerbeek H. Five-Year Changes in Community-Level Sport Participation, and the Role of Gender Strategies. *Frontiers in Sports and Active Living*. 2021;3.
8. Statista. Women's sports participation in the United Kingdom (UK)2020:[1–73 pp.].
9. Dos'Santos T, Thomas C, McBurnie A, Donelon T, Herrington L, Jones PA. The Cutting Movement Assessment Score (CMAS) qualitative screening tool: application to mitigate anterior cruciate ligament injury risk during cutting. *Biomechanics*. 2021; 1(1):83–101.
10. Myer GD, Ford KR, Di Stasi SL, Foss KDB, Micheli LJ, Hewett TE. High knee abduction moments are common risk factors for patellofemoral pain (PFP) and anterior cruciate ligament (ACL) injury in girls: is PFP itself a predictor for subsequent ACL injury? *Br J Sports Med*. 2015; 49(2):118–22. <https://doi.org/10.1136/bjsports-2013-092536> PMID: 24687011
11. Price MJ, Tuca M, Cordasco FA, Green DW. Nonmodifiable risk factors for anterior cruciate ligament injury. *Current opinion in pediatrics*. 2017; 29(1):55–64. <https://doi.org/10.1097/MOP.0000000000000444> PMID: 27861256
12. Acevedo RJ, Rivera-Vega A, Miranda G, Micheo W. Anterior cruciate ligament injury: identification of risk factors and prevention strategies. *Current sports medicine reports*. 2014; 13(3):186–91. <https://doi.org/10.1249/JSR.0000000000000053> PMID: 24819011
13. Pfeifer CE, Beattie PF, Sacko RS, Hand A. Risk factors associated with non-contact anterior cruciate ligament injury: a systematic review. *Int J Sports Phys Ther*. 2018; 13(4):575–87. PMID: 30140551
14. Schilaty ND, Bates NA, Nagelli C, Krych AJ, Hewett TE. Sex-Based Differences in Knee Kinetics With Anterior Cruciate Ligament Strain on Cadaveric Impact Simulations. *Orthopaedic Journal of Sports Medicine*. 2018; 6(3):2325967118761037. <https://doi.org/10.1177/2325967118761037> PMID: 29568787
15. Mendiguchia J, Ford KR, Quatman CE, Alentorn-Geli E, Hewett TE. Sex differences in proximal control of the knee joint. *Sports Med*. 2011; 41(7):541–57. <https://doi.org/10.2165/11589140-000000000-00000> PMID: 21688868
16. Sigward SM, Cesar GM, Havens KL. Predictors of frontal plane knee moments during side-step cutting to 45 and 110 degrees in men and women: implications for anterior cruciate ligament injury. *Clin J Sport Med*. 2015; 25(6):529–34. <https://doi.org/10.1097/JSM.0000000000000155> PMID: 25290102
17. McLean SG, Walker KB, van den Bogert AJ. Effect of gender on lower extremity kinematics during rapid direction changes: an integrated analysis of three sports movements. *J Sci Med Sport*. 2005; 8(4):411–22. [https://doi.org/10.1016/s1440-2440\(05\)80056-8](https://doi.org/10.1016/s1440-2440(05)80056-8) PMID: 16602169
18. Bencke J, Aagaard P, Zebis MK. Muscle activation during acl injury risk movements in young female athletes: A Narrative Review. *Frontiers in Physiology*. 2018; 9:445. <https://doi.org/10.3389/fphys.2018.00445> PMID: 29867521
19. Sigward SM, Powers C. The influence of gender on knee kinematics, kinetics and muscle activation patterns during side-step cutting. *Clin Biomech*. 2006; 21(1):41–8. <https://doi.org/10.1016/j.clinbiomech.2005.08.001> PMID: 16209900
20. Malinzak RA, Colby SM, Kirkendall DT, Yu B, Garrett WE. A comparison of knee joint motion patterns between men and women in selected athletic tasks. *Clin Biomech*. 2001; 16(5):438–45. [https://doi.org/10.1016/s0268-0033\(01\)00019-5](https://doi.org/10.1016/s0268-0033(01)00019-5) PMID: 11390052
21. Truong LK, Bekker S, Whittaker JL. Removing the training wheels: embracing the social, contextual and psychological in sports medicine. *BMJ Publishing Group Ltd and British Association of Sport and Exercise Medicine*; 2021. <https://doi.org/10.1136/bjsports-2020-102679> PMID: 33184111
22. Bruton MR, O'Dwyer N, Adams R. Sex differences in the kinematics and neuromuscular control of landing: biological, environmental and sociocultural factors. *J Electromyogr Kines*. 2013; 23(4):747–58. <https://doi.org/10.1016/j.jelekin.2013.04.012> PMID: 23731700
23. Emmonds S, Heyward O, Jones B. The challenge of applying and undertaking research in female sport. *Sports medicine-open*. 2019; 5(1):1–4.
24. McNulty KL, Elliott-Sale KJ, Dolan E, Swinton PA, Ansdell P, Goodall S, et al. The effects of menstrual cycle phase on exercise performance in eumenorrhic women: a systematic review and meta-analysis. *Sports Med*. 2020:1–15.
25. Elliott-Sale KJ, Minahan CL, de Jonge XAJ, Ackerman KE, Sipilä S, Constantini NW, et al. Methodological considerations for studies in sport and exercise science with women as participants: a working guide for standards of practice for research on women. *Sports Med*. 2021; 51(5):843–61. <https://doi.org/10.1007/s40279-021-01435-8> PMID: 33725341

26. Elliott-Sale K, Ross E, Burden R, Hicks K. The BASES expert statement on conducting and implementing female athlete based research. *The Sport and Exercise Scientist*. 2020(65):6–7.
27. Carmichael MA, Thomson RL, Moran LJ, Wycherley TP. The Impact of Menstrual Cycle Phase on Athletes' Performance: A Narrative Review. *International journal of environmental research and public health*. 2021; 18(4):1667. <https://doi.org/10.3390/ijerph18041667> PMID: 33572406
28. Park E-J, Lee J-H, Ryue J-J, Sohn J-H, Lee K-K. Influence of anticipation on landing patterns during side-cutting maneuver in female collegiate soccer players. *Korean Journal of Sport Biomechanics*. 2011; 21(4):391–5.
29. JANSE DE JONGE X, Thompson B, Han A. Methodological recommendations for menstrual cycle research in sports and exercise. *Med Sci Sports Exerc*. 2019; 51(12):2610–7. <https://doi.org/10.1249/MSS.0000000000002073> PMID: 31246715
30. Blagrove RC, Bruinvels G, Pedlar CR. Variations in strength-related measures during the menstrual cycle in eumenorrhic women: A systematic review and meta-analysis. *J Sci Med Sport*. 2020; 23(12):1220–7. <https://doi.org/10.1016/j.jsams.2020.04.022> PMID: 32456980
31. Yim J, Petrofsky J, Lee H. Correlation between mechanical properties of the ankle muscles and postural sway during the menstrual cycle. *The Tohoku journal of experimental medicine*. 2018; 244(3):201–7. <https://doi.org/10.1620/tjem.244.201> PMID: 29540626
32. Sung E-S, Kim J-H. The difference effect of estrogen on muscle tone of medial and lateral thigh muscle during ovulation. *Journal of exercise rehabilitation*. 2018; 14(3):419. <https://doi.org/10.12965/jer.1836110.055> PMID: 30018928
33. Park S-K, Stefanyshyn DJ, Ramage B, Hart DA, Ronsky JL. Alterations in knee joint laxity during the menstrual cycle in healthy women leads to increases in joint loads during selected athletic movements. *Am J Sport Med*. 2009; 37(6):1169–77. <https://doi.org/10.1177/0363546508330146> PMID: 19289541
34. Park S-K, Stefanyshyn DJ, Ramage B, Hart DA, Ronsky JL. Relationship between knee joint laxity and knee joint mechanics during the menstrual cycle. *Br J Sports Med*. 2009; 43(3):174–9. <https://doi.org/10.1136/bjism.2008.049270> PMID: 18728055
35. Okazaki M, Kaneko M, Ishida Y, Murase N, Katsumura T. Changes in the width of the tibiofibular syndesmosis related to lower extremity joint dynamics and neuromuscular coordination on drop landing during the menstrual cycle. *Orthopaedic journal of sports medicine*. 2017; 5(9):2325967117724753. <https://doi.org/10.1177/2325967117724753> PMID: 28913369
36. Shultz SJ, Kirk SE, Johnson ML, Sander TC, Perrin DH. Relationship between sex hormones and anterior knee laxity across the menstrual cycle. *Med Sci Sports Exerc*. 2004; 36(7). <https://doi.org/10.1249/01.mss.0000132270.43579.1a> PMID: 15235320
37. Sarwar R, Niclos BB, Rutherford O. Changes in muscle strength, relaxation rate and fatigability during the human menstrual cycle. *The Journal of physiology*. 1996; 493(1):267–72. <https://doi.org/10.1113/jphysiol.1996.sp021381> PMID: 8735711
38. Ansdell P, Brownstein CG, Škarabot J, Hicks KM, Simoes DC, Thomas K, et al. Menstrual cycle-associated modulations in neuromuscular function and fatigability of the knee extensors in eumenorrhic women. *Journal of Applied Physiology*. 2019; 126(6):1701–12. <https://doi.org/10.1152/jappphysiol.01041.2018> PMID: 30844334
39. Balachandar V, Marciniak J-L, Wall O, Balachandar C. Effects of the menstrual cycle on lower-limb biomechanics, neuromuscular control, and anterior cruciate ligament injury risk: a systematic review. *Muscles, ligaments and tendons journal*. 2017; 7(1):136. <https://doi.org/10.11138/mltj/2017.7.1.136> PMID: 28717621
40. Hewett TE, Zazulak BT, Myer GD. Effects of the menstrual cycle on anterior cruciate ligament injury risk: a systematic review. *Am J Sport Med*. 2007; 35(4):659–68. <https://doi.org/10.1177/0363546506295699> PMID: 17293469
41. Martin D, Timmins K, Cowie C, Alty J, Mehta R, Tang A, et al. Injury incidence across the menstrual cycle in international footballers. *Frontiers in sports and active living*. 2021; 3:17.
42. Somerson JS, Isby IJ, Hagen MS, Kweon CY, Gee AO. The menstrual cycle may affect anterior knee laxity and the rate of anterior cruciate ligament rupture: a systematic review and meta-analysis. *JBJS reviews*. 2019; 7(9):e2. <https://doi.org/10.2106/JBJS.RVW.18.00198> PMID: 31490339
43. Page MJ, Moher D, Bossuyt PM, Boutron I, Hoffmann TC, Mulrow CD, et al. PRISMA 2020 explanation and elaboration: updated guidance and exemplars for reporting systematic reviews. *Bmj*. 2021;372. <https://doi.org/10.1136/bmj.n160> PMID: 33781993
44. Methley AM, Campbell S, Chew-Graham C, McNally R, Cheraghi-Sohi S. PICO, PICOS and SPIDER: a comparison study of specificity and sensitivity in three search tools for qualitative systematic reviews. *BMC health services research*. 2014; 14(1):1–10. <https://doi.org/10.1186/s12913-014-0579-0> PMID: 25413154

45. McKay AK, Stellingwerff T, Smith ES, Martin DT, Mujika I, Goosey-Tolfrey VL, et al. Defining Training and Performance Caliber: A Participant Classification Framework. *Int J Sports Physiol and Perform*. 2022; 17(2):317–31. <https://doi.org/10.1123/ijsp.2021-0451> PMID: 34965513
46. Donelon TA, Dos'Santos T, Pitchers G, Brown M, Jones PA. Biomechanical determinants of knee joint loads associated with increased anterior cruciate ligament loading during cutting: a systematic review and technical framework. *Sports Medicine-Open*. 2020; 6(1):1–21.
47. Beaulieu ML, Ashton-Miller JA, Wojtys EM. Loading mechanisms of the anterior cruciate ligament. *Sport Biomech*. 2021:1–29. <https://doi.org/10.1080/14763141.2021.1916578> PMID: 33957846
48. Hewett T, Myer GD, Ford KR, Heidt RS, Colosimo AJ, McLean SG, et al. Biomechanical measures of neuromuscular control and valgus loading of the knee predict anterior cruciate ligament injury risk in female athletes a prospective study. *Am J Sport Med*. 2005; 33(4):492–501. <https://doi.org/10.1177/0363546504269591> PMID: 15722287
49. Sinclair J, Brooks D, Stainton P. Sex differences in ACL loading and strain during typical athletic movements: a musculoskeletal simulation analysis. *European journal of applied physiology*. 2019; 119(3):713–21. <https://doi.org/10.1007/s00421-018-04062-w> PMID: 30610444
50. Weinhandl JT, Earl-Boehm JE, Ebersole KT, Huddleston WE, Armstrong BS, O'connor KM. Reduced hamstring strength increases anterior cruciate ligament loading during anticipated sidestep cutting. *Clin Biomech*. 2014; 29(7):752–9. <https://doi.org/10.1016/j.clinbiomech.2014.05.013> PMID: 24970112
51. Yu B, Lin C-F, Garrett WE. Lower extremity biomechanics during the landing of a stop-jump task. *Clin Biomech*. 2006; 21(3):297–305. <https://doi.org/10.1016/j.clinbiomech.2005.11.003> PMID: 16378667
52. Fox AS. Change-of-Direction Biomechanics: Is What's Best for Anterior Cruciate Ligament Injury Prevention Also Best for Performance? *Sports Med*. 2018; 48(8):1799–807. <https://doi.org/10.1007/s40279-018-0931-3> PMID: 29721837
53. Zebis MK, Andersen LL, Bencke J, Kjaer M, Aagaard P. Identification of athletes at future risk of anterior cruciate ligament ruptures by neuromuscular screening. *Am J Sport Med*. 2009; 37(10):1967–73. <https://doi.org/10.1177/0363546509335000> PMID: 19574475
54. Smeets A, Malfait B, Dingenen B, Robinson MA, Vanrenterghem J, Peers K, et al. Is knee neuromuscular activity related to anterior cruciate ligament injury risk? A pilot study. *Knee*. 2019; 26(1):40–51. <https://doi.org/10.1016/j.knee.2018.10.006> PMID: 30415973
55. Lloyd DG, Buchanan TS. Strategies of muscular support of varus and valgus isometric loads at the human knee. *J Biomech*. 2001; 34(10):1257–67. [https://doi.org/10.1016/s0021-9290\(01\)00095-1](https://doi.org/10.1016/s0021-9290(01)00095-1) PMID: 11522305
56. Maniar N, Schache AG, Pizzolato C, Opar DA. Muscle contributions to tibiofemoral shear forces and valgus and rotational joint moments during single leg drop landing. *Scand J Med Sci Spor*. 2020. <https://doi.org/10.1111/sms.13711> PMID: 32416625
57. Maniar N, Schache AG, Sritharan P, Opar DA. Non-knee-spanning muscles contribute to tibiofemoral shear as well as valgus and rotational joint reaction moments during unanticipated sidestep cutting. *Sci Rep*. 2018; 8(1):2501. <https://doi.org/10.1038/s41598-017-19098-9> PMID: 29410451
58. Adouni M, Shirazi-Adl A, Marouane H. Role of gastrocnemius activation in knee joint biomechanics: gastrocnemius acts as an ACL antagonist. *Computer methods in biomechanics and biomedical engineering*. 2016; 19(4):376–85. <https://doi.org/10.1080/10255842.2015.1032943> PMID: 25892616
59. Mokhtarzadeh H, Yeow CH, Goh JCH, Oetomo D, Malekipour F, Lee PV-S. Contributions of the soleus and gastrocnemius muscles to the anterior cruciate ligament loading during single-leg landing. *J Biomech*. 2013; 46(11):1913–20. <https://doi.org/10.1016/j.jbiomech.2013.04.010> PMID: 23731572
60. Balshem H, Helfand M, Schünemann HJ, Oxman AD, Kunz R, Brozek J, et al. GRADE guidelines: 3. Rating the quality of evidence. *Journal of clinical epidemiology*. 2011; 64(4):401–6. <https://doi.org/10.1016/j.jclinepi.2010.07.015> PMID: 21208779
61. Guyatt G, Oxman AD, Akl EA, Kunz R, Vist G, Brozek J, et al. GRADE guidelines: 1. Introduction—GRADE evidence profiles and summary of findings tables. *Journal of clinical epidemiology*. 2011; 64(4):383–94. <https://doi.org/10.1016/j.jclinepi.2010.04.026> PMID: 21195583
62. Abt JP, Sell TC, Laudner KG, McCrory JL, Loucks TL, Berga SL, et al. Neuromuscular and biomechanical characteristics do not vary across the menstrual cycle. *Knee Surgery, Sports Traumatology, Arthroscopy*. 2007; 15(7):901–7. <https://doi.org/10.1007/s00167-007-0302-3> PMID: 17364205
63. Shultz SJ, Schmitz RJ, Kong Y, Dudley WN, Beynon BD, Nguyen A-D, et al. Cyclic variations in multi-planar knee laxity influence landing biomechanics. *Med Sci Sports Exerc*. 2012; 44(5):900–9. <https://doi.org/10.1249/MSS.0b013e31823bfb25> PMID: 22033513
64. Dedrick GS, Sizer PS, Merkle JN, Hounshell TR, Robert-McComb JJ, Sawyer SF, et al. Effect of sex hormones on neuromuscular control patterns during landing. *J Electromyogr Kines*. 2008; 18(1):68–78. <https://doi.org/10.1016/j.jelekin.2006.09.004> PMID: 17079166

65. Chaudhari AM, Lindenfeld TN, Andriacchi TP, Hewett TE, Riccobene J, Myer GD, et al. Knee and hip loading patterns at different phases in the menstrual cycle. *Am J Sport Med.* 2007; 35(5):793–800.
66. Wojtys EM, Wylie BB, Huston LJ. The effects of muscle fatigue on neuromuscular function and anterior tibial translation in healthy knees. *Am J Sport Med.* 1996; 24(5):615–21. <https://doi.org/10.1177/036354659602400509> PMID: 8883681
67. Chidi-Ogbolu N, Baar K. Effect of estrogen on musculoskeletal performance and injury risk. *Frontiers in physiology.* 2019:1834. <https://doi.org/10.3389/fphys.2018.01834> PMID: 30697162
68. Smith SS, Woodward DJ, Chapin JK. Sex steroids modulate motor-correlated increases in cerebellar discharge. *Brain research.* 1989; 476(2):307–16. [https://doi.org/10.1016/0006-8993\(89\)91251-1](https://doi.org/10.1016/0006-8993(89)91251-1) PMID: 2702471
69. Smith SS, Woolley CS. Cellular and molecular effects of steroid hormones on CNS excitability. *Cleveland Clinic journal of medicine.* 2004; 71(2):S4. PMID: 15379294
70. Besier TF, Lloyd DG, Cochrane JL, Ackland TR. External loading of the knee joint during running and cutting maneuvers. *Med Sci Sports Exerc.* 2001; 33(7):1168–75. <https://doi.org/10.1097/00005768-200107000-00014> PMID: 11445764
71. McLean SG, Huang X, van den Bogert AJ. Association between lower extremity posture at contact and peak knee valgus moment during sidestepping: implications for ACL injury. *Clin Biomech.* 2005; 20(8):863–70. <https://doi.org/10.1016/j.clinbiomech.2005.05.007> PMID: 16005555
72. Dempsey AR, Lloyd DG, Elliott BC, Steele JR, Munro BJ. Changing sidestep cutting technique reduces knee valgus loading. *Am J Sport Med.* 2009; 37(11):2194–200. <https://doi.org/10.1177/0363546509334373> PMID: 19509415
73. Myer GD, Ford KR, Paterno MV, Nick TG, Hewett TE. The effects of generalized joint laxity on risk of anterior cruciate ligament injury in young female athletes. *Am J Sport Med.* 2008; 36(6):1073–80. <https://doi.org/10.1177/0363546507313572> PMID: 18326833
74. Uhorchak JM, Scoville CR, Williams GN, Arciero RA, Pierre PS, Taylor DC. Risk factors associated with noncontact injury of the anterior cruciate ligament. *Am J Sport Med.* 2003; 31(6):831–42.
75. Burden R, Shill A, Bishop N. Elite female athlete research: stop searching for the ‘magic P’. *Experimental Physiology.* 2021; 106(10):2029–30.
76. McMillin SL, Minchew EC, Lowe DA, Spangenburg EE. Skeletal muscle wasting: the estrogen side of sexual dimorphism. *American Journal of Physiology-Cell Physiology.* 2022; 322(1):C24–C37. <https://doi.org/10.1152/ajpcell.00333.2021> PMID: 34788147
77. Koga H, Nakamae A, Shima Y, Iwasa J, Myklebust G, Engebretsen L, et al. Mechanisms for noncontact anterior cruciate ligament injuries knee joint kinematics in 10 injury situations from female team handball and basketball. *Am J Sport Med.* 2010; 38(11):2218–25. <https://doi.org/10.1177/0363546510373570> PMID: 20595545
78. Donnelly CJ, Lloyd DG, Elliott BC, Reinbolt JA. Optimizing whole-body kinematics to minimize valgus knee loading during sidestepping: implications for ACL injury risk. *J Biomech.* 2012; 45(8):1491–7. <https://doi.org/10.1016/j.jbiomech.2012.02.010> PMID: 22387123
79. Jones PA, Herrington LC, Munro AG, Graham-Smith P. Is there a relationship between landing, cutting, and pivoting tasks in terms of the characteristics of dynamic valgus? *Am J Sport Med.* 2014; 42(9):2095–102.
80. Dos' Santos T, Thomas C, Jones PA. The effect of angle on change of direction biomechanics: Comparison and inter-task relationships. *J Sports Sci.* 2021; 39(12):2618–31. <https://doi.org/10.1080/02640414.2021.1948258> PMID: 34278968
81. Chinnasee C, Weir G, Sasimontonkul S, Alderson J, Donnelly C. A Biomechanical Comparison of Single-Leg Landing and Unplanned Sidestepping. *Int J Sports Med.* 2018; 39(08):636–45. <https://doi.org/10.1055/a-0592-7422> PMID: 29902807
82. Kristianslund E, Krosshaug T. Comparison of drop jumps and sport-specific sidestep cutting: implications for anterior cruciate ligament injury risk screening. *Am J Sport Med.* 2013; 41(3):684–8.
83. Maruyama S, Yamazaki T, Sato Y, Suzuki Y, Shimizu S, Ikezu M, et al. Relationship Between Anterior Knee Laxity and General Joint Laxity During the Menstrual Cycle. *Orthopaedic Journal of Sports Medicine.* 2021; 9(3):2325967121993045. <https://doi.org/10.1177/2325967121993045> PMID: 33855094
84. Runer A, di Sarsina TR, Starke V, Ilchev A, Felmet G, Braun S, et al. The evaluation of Rolimeter, KLT, KiRA and KT-1000 arthrometer in healthy individuals shows acceptable intra-rater but poor inter-rater reliability in the measurement of anterior tibial knee translation. *Knee Surgery, Sports Traumatology, Arthroscopy.* 2021:1–10.
85. Ganko A, Engebretsen L, Ozer H. The rolimeter: a new arthrometer compared with the KT-1000. *Knee Surgery, Sports Traumatology, Arthroscopy.* 2000; 8(1):36–9. <https://doi.org/10.1007/s001670050008> PMID: 10663318



86. Pugh L, Mascarenhas R, Arneja S, Chin PY, Leith JM. Current concepts in instrumented knee-laxity testing. *Am J Sport Med.* 2009; 37(1):199–210. <https://doi.org/10.1177/0363546508323746> PMID: 18940931
87. Teng PSP, Leong KF, Yi Xian Phua P, Kong PW. An exploratory study of the use of ultrasound in the measurement of anterior tibial translation under gastrocnemius muscle stimulation. *Res Sports Med.* 2021; 29(2):103–15. <https://doi.org/10.1080/15438627.2020.1840378> PMID: 33118836
88. Beldame J, Mouchel S, Bertiaux S, Adam J-M, Mouilhade F, Roussignol X, et al. Anterior knee laxity measurement: comparison of passive stress radiographs Telos® and “Lerat”, and GNRB® arthrometer. *Orthopaedics & Traumatology: Surgery & Research.* 2012; 98(7):744–50.
89. Costello JT, Bieuzen F, Bleakley CM. Where are all the female participants in Sports and Exercise Medicine research? *Eur J Sports Sci.* 2014; 14(8):847–51. <https://doi.org/10.1080/17461391.2014.911354> PMID: 24766579
90. Cowley ES, Olenick AA, McNulty KL, Ross EZ. “Invisible Sportswomen”: The Sex Data Gap in Sport and Exercise Science Research. *Women in Sport and Physical Activity Journal.* 2021; 29(2):146–51.
91. Abt G, Boreham C, Davison G, Jackson R, Nevill A, Wallace E, et al. Power, precision, and sample size estimation in sport and exercise science research. *Journal of Sports Sciences.* 2020; 38(17):1933–5. <https://doi.org/10.1080/02640414.2020.1776002> PMID: 32558628
92. Hecksteden A, Kellner R, Donath L. Dealing with small samples in football research. *Science and Medicine in Football.* 2021:1–9. <https://doi.org/10.1080/24733938.2021.1978106> PMID: 35862155
93. Nimphius S. Exercise and sport science failing by design in understanding female athletes. *Int J Sports Physiol and Perform.* 2019; 14(9):1157–8. <https://doi.org/10.1123/ijsp.2019-0703> PMID: 31553942
94. Sigward SM, Powers C. The influence of experience on knee mechanics during side-step cutting in females. *Clin Biomech.* 2006; 21(7):740–7. <https://doi.org/10.1016/j.clinbiomech.2006.03.003> PMID: 16675083
95. Spiteri T, Cochrane JL, Hart NH, Haff GG, Nimphius S. Effect of strength on plant foot kinetics and kinematics during a change of direction task. *Eur J Sports Sci.* 2013; 13(6):646–52. <https://doi.org/10.1080/17461391.2013.774053> PMID: 24251742
96. Orishimo KF, Liederbach M, Kremenec IJ, Hagins M, Pappas E. Comparison of landing biomechanics between male and female dancers and athletes, part 1: Influence of sex on risk of anterior cruciate ligament injury. *Am J Sport Med.* 2014; 42(5):1082–8. <https://doi.org/10.1177/0363546514523928> PMID: 24590005
97. Liederbach M, Dilgen FE, Rose DJ. Incidence of anterior cruciate ligament injuries among elite ballet and modern dancers: a 5-year prospective study. *Am J Sport Med.* 2008; 36(9):1779–88. <https://doi.org/10.1177/0363546508323644> PMID: 18753681
98. Cook CJ, Kilduff LP, Crewther BT. Basal and stress-induced salivary testosterone variation across the menstrual cycle and linkage to motivation and muscle power. *Scand J Med Sci Spor.* 2018; 28(4):1345–53. <https://doi.org/10.1111/sms.13041> PMID: 29266410
99. Dos’ Santos T, McBurnie A, Thomas C, Comfort P, Jones PA. Biomechanical Comparison of Cutting Techniques: A Review and Practical Applications. *Strength Cond J.* 2019; 41(4):40–54.
100. Dos’ Santos T, McBurnie A, Thomas C, A. JP, Harper DJ. Attacking Agility Actions: Match Play Contextual Applications With Coaching and Technique Guidelines. *Strength Cond J.* 2022:Published ahead of print.
101. Dos’ Santos T, Thomas C, Comfort P, Jones PA. The effect of angle and velocity on change of direction biomechanics: an angle-velocity trade-off. *Sports Med.* 2018; 48(10):2235–53. <https://doi.org/10.1007/s40279-018-0968-3> PMID: 30094799
102. Dos’ Santos T, Thomas C, Jones PA. How Early Should You Brake During A 180° Turn? A Kinetic Comparison Of The Antepenultimate, Penultimate, And Final Foot Contacts During A 505 Change Of Direction Speed Test. *J Sports Sci.* 2021; 39(4):395–405.
103. Dos’ Santos T, Thomas C, Comfort P, Jones PA. The Role of the Penultimate Foot Contact During Change of Direction: Implications on Performance and Risk of Injury. *Strength Cond J.* 2019; 41(1):87–104.
104. Brophy RH, Stepan JG, Silvers HJ, Mandelbaum BR. Defending puts the anterior cruciate ligament at risk during soccer: a gender-based analysis. *Sports health.* 2015; 7(3):244–9. <https://doi.org/10.1177/1941738114535184> PMID: 26131302
105. Cochrane JL, Lloyd DG, Buttfield A, Seward H, McGivern J. Characteristics of anterior cruciate ligament injuries in Australian football. *J Sci Med Sport.* 2007; 10(2):96–104. <https://doi.org/10.1016/j.jsams.2006.05.015> PMID: 16807104

106. Boden BP, Torg JS, Knowles SB, Hewett TE. Video analysis of anterior cruciate ligament injury abnormalities in hip and ankle kinematics. *Am J Sport Med.* 2009; 37(2):252–9. <https://doi.org/10.1177/0363546508328107> PMID: 19182110
107. Della Villa F, Buckthorpe M, Grassi A, Nabiuzzi A, Tosarelli F, Zaffagnini S, et al. Systematic video analysis of ACL injuries in professional male football (soccer): injury mechanisms, situational patterns and biomechanics study on 134 consecutive cases. *Br J Sports Med.* 2020; 54:1423–32. <https://doi.org/10.1136/bjsports-2019-101247> PMID: 32561515
108. Fox AS, Bonacci J, McLean SG, Saunders N. Exploring individual adaptations to an anterior cruciate ligament injury prevention programme. *Knee.* 2018; 25(1):83–98. <https://doi.org/10.1016/j.knee.2017.11.011> PMID: 29329889
109. Cowling E, Steele J, McNair P. Training quadriceps-hamstring muscle synchrony: Do group data mask individual lower limb muscle coordination strategies? *J Sci Med Sport.* 2003; 6(S1):90.
110. Dos'Santos T, Thomas C, Comfort P, Jones PA. Biomechanical effects of a 6-week change-of-direction technique modification intervention on anterior cruciate ligament injury risk. *J Strength Cond Res.* 2021; 35(8):2133–44. <https://doi.org/10.1519/JSC.0000000000004075> PMID: 34127609
111. Mendiguchia J, Conceição F, Edouard P, Fonseca M, Pereira R, Lopes H, et al. Sprint versus isolated eccentric training: Comparative effects on hamstring architecture and performance in soccer players. *Plos one.* 2020; 15(2):e0228283. <https://doi.org/10.1371/journal.pone.0228283> PMID: 32045411
112. Dos'Santos T, McBurnie A, Comfort P, Jones PA. The Effects of Six-Weeks Change of Direction Speed and Technique Modification Training on Cutting Performance and Movement Quality in Male Youth Soccer Players. *Sports.* 2019; 7(9):205. <https://doi.org/10.3390/sports7090205> PMID: 31489929
113. Weissgerber TL, Milic NM, Winham SJ, Garovic VD. Beyond bar and line graphs: time for a new data presentation paradigm. *PLoS biology.* 2015; 13(4):e1002128. <https://doi.org/10.1371/journal.pbio.1002128> PMID: 25901488
114. Sankey SP, Azidin RMFR, Robinson MA, Malfait B, Deschamps K, Verschueren S, et al. How reliable are knee kinematics and kinetics during side-cutting manoeuvres? *Gait Posture.* 2015; 41(4):905–11. <https://doi.org/10.1016/j.gaitpost.2015.03.014> PMID: 25843234
115. Mok K-M, Bahr R, Krosshaug T. Reliability of lower limb biomechanics in two sport-specific sidestep cutting tasks. *Sport Biomech.* 2018; 17:157–67. <https://doi.org/10.1080/14763141.2016.1260766> PMID: 28281390
116. Dos'Santos T. Biomechanical determinants of injury risk and performance during change of direction: implications for screening and intervention: University of Salford; 2020.
117. Mullineaux DR, Bartlett RM, Bennett S. Research design and statistics in biomechanics and motor control. *J Sports Sci.* 2001; 19(10):739–60. <https://doi.org/10.1080/026404101317015410> PMID: 11561672
118. Hashemi J, Breighner R, Chandrashekar N, Hardy DM, Chaudhari AM, Shultz SJ, et al. Hip extension, knee flexion paradox: a new mechanism for non-contact ACL injury. *J Biomech.* 2011; 44(4):577–85. <https://doi.org/10.1016/j.jbiomech.2010.11.013> PMID: 21144520
119. Welch N, Richter C, Franklyn-Miller A, Moran K. Principal Component Analysis of the Biomechanical Factors Associated With Performance During Cutting. *J Strength Cond Res.* 2021; 35(6):1715–23. <https://doi.org/10.1519/JSC.0000000000003022> PMID: 30664108
120. Mullineaux DR, Wheat J. Research methods: sample size and variability effects on statistical power. In: Payton CJ, Burden A, editors. *Biomechanical Evaluation of Movement in Sport and Exercise: The British Association of Sport and Exercise Sciences Guide*: Routledge; 2017.
121. Robinson MA, Vanrenterghem J, Pataky TC. Statistical Parametric Mapping (SPM) for alpha-based statistical analyses of multi-muscle EMG time-series. *J Electromyogr Kines.* 2015; 25(1):14–9. <https://doi.org/10.1016/j.jelekin.2014.10.018> PMID: 25465983
122. Pataky TC, Robinson MA, Vanrenterghem J, Savage R, Bates KT, Crompton RH. Vector field statistics for objective center-of-pressure trajectory analysis during gait, with evidence of scalar sensitivity to small coordinate system rotations. *Gait Posture.* 2014; 40(1):255–8. <https://doi.org/10.1016/j.gaitpost.2014.01.023> PMID: 24726191
123. Pataky TC, Robinson MA, Vanrenterghem J. Vector field statistical analysis of kinematic and force trajectories. *J Biomech.* 2013; 46(14):2394–401. <https://doi.org/10.1016/j.jbiomech.2013.07.031> PMID: 23948374
124. Pataky TC. Generalized n-dimensional biomechanical field analysis using statistical parametric mapping. *J Biomech.* 2010; 43(10):1976–82. <https://doi.org/10.1016/j.jbiomech.2010.03.008> PMID: 20434726
125. Preatoni E, Hamill J, Harrison AJ, Hayes K, Van Emmerik REA, Wilson C, et al. Movement variability and skills monitoring in sports. *Sport Biomech.* 2013; 12(2):69–92. <https://doi.org/10.1080/14763141.2012.738700> PMID: 23898682

126. Brown C, Bowser B, Simpson KJ. Movement variability during single leg jump landings in individuals with and without chronic ankle instability. *Clin Biomech.* 2012; 27(1):52–63. <https://doi.org/10.1016/j.clinbiomech.2011.07.012> PMID: 21862188
127. Stergiou N, Harbourne RT, Cavanaugh JT. Optimal movement variability: a new theoretical perspective for neurologic physical therapy. *Journal of Neurologic Physical Therapy.* 2006; 30(3):120–9. <https://doi.org/10.1097/01.npt.0000281949.48193.d9> PMID: 17029655
128. Richter C, Marshall B, Moran K. Comparison of discrete-point vs. dimensionality-reduction techniques for describing performance-related aspects of maximal vertical jumping. *J Biomech.* 2014; 47(12):3012–7. <https://doi.org/10.1016/j.jbiomech.2014.07.001> PMID: 25059895
129. Richter C, O'Connor NE, Marshall B, Moran K. Analysis of characterizing phases on waveforms: an application to vertical jumps. *Journal of applied biomechanics.* 2014; 30(2):316–21.
130. Vanrenterghem J, Venables E, Pataky T, Robinson MA. The effect of running speed on knee mechanical loading in females during side cutting. *J Biomech.* 2012; 45(14):2444–9. <https://doi.org/10.1016/j.jbiomech.2012.06.029> PMID: 22835648
131. Robinson MA, Donnelly CJ, Tsao J, Vanrenterghem J. Impact of knee modeling approach on indicators and classification of ACL injury risk. *Med Sci Sports Exerc.* 2013; 46:1269–76.
132. Franklyn-Miller A, Richter C, King E, Gore S, Moran K, Strike S, et al. Athletic groin pain (part 2): a prospective cohort study on the biomechanical evaluation of change of direction identifies three clusters of movement patterns. *Br J Sports Med.* 2017; 51(5):460–8. <https://doi.org/10.1136/bjsports-2016-096050> PMID: 28209597
133. McMahon JJ, Rej SJE, Comfort P. Sex differences in countermovement jump phase characteristics. *Sports.* 2017; 5(1):8. <https://doi.org/10.3390/sports5010008> PMID: 29910368
134. Cormie P, McBride JM, McCaulley GO. Power-time, force-time, and velocity-time curve analysis of the countermovement jump: impact of training. *J Strength Cond Res.* 2009; 23(1):177–86. <https://doi.org/10.1519/JSC.0b013e3181889324> PMID: 19077740
135. McMahon JJ, Murphy S, Rej SJE, Comfort P. Countermovement jump phase characteristics of senior and academy rugby league players. *Int J Sports Physiol and Perform.* 2017; 12(6):803–11. <https://doi.org/10.1123/ijsp.2016-0467> PMID: 27918658
